1 **Novel insights on obligate symbiont lifestyle and adaptation to chemosynthetic**  
2 **environment as revealed by the giant tubeworm genome**

3 André Luiz de Oliveira<sup>1</sup>, Jessica Mitchell<sup>2</sup>, Peter Girguis<sup>2</sup>, Monika Bright<sup>1</sup>

4

5 <sup>1</sup> Department of Functional and Evolutionary Ecology, University of Vienna, Austria

6 <sup>2</sup> Department of Organismic and Evolutionary Biology, Harvard University, Cambridge, MA, USA

## 7 **Abstract**

8 The mutualism between the giant tubeworm *Riftia pachyptila* and its endosymbiont *Candidatus*  
9 *Endoriftia persephone* has been extensively researched over the past 40 years. However, the lack  
10 of the host whole genome information has impeded the full comprehension of the  
11 genotype/phenotype interface in *Riftia*. Here we described the high-quality draft genome of *Riftia*,  
12 its complete mitogenome, and tissue-specific transcriptomic data. The *Riftia* genome presents  
13 signs of reductive evolution, with gene family contractions exceeding expansions. Expanded gene  
14 families are related to sulphur metabolism, detoxification, anti-oxidative stress, oxygen transport,  
15 immune system, and lysosomal digestion, reflecting evolutionary adaptations to the vent  
16 environment and endosymbiosis. Despite the derived body plan, the developmental gene  
17 repertoire in the gutless tubeworm is extremely conserved with the presence of a near intact and  
18 complete Hox cluster. Gene expression analyses establishes that the trophosome is a multi-  
19 functional organ marked by intracellular digestion of endosymbionts, storage of excretory products  
20 and haematopoietic functions. Overall, the plume and gonad tissues both in contact to the  
21 environment harbour highly expressed genes involved with cell cycle, programmed cell death, and  
22 immunity indicating a high cell turnover and defence mechanisms against pathogens. We posit that  
23 the innate immune system plays a more prominent role into the establishment of the symbiosis  
24 during the infection in the larval stage, rather than maintaining the symbiostasis in the trophosome.  
25 This genome bridges four decades of physiological research in *Riftia*, whilst simultaneously  
26 provides new insights into the development, whole organism functions and evolution in the giant  
27 tubeworm.

28

29 **Main.** The discovery of the giant tubeworm *Riftia pachyptila* Jones, 1981 at deep-sea hydrothermal  
30 vents on the Galapagos Spreading centre in 1977 (Corliss et al. 1979) has initiated the onset of a  
31 continuous torrent of studies (Childress and Fisher 1992; Nelson and Fisher 1995; Stewart and  
32 Cavanaugh 2006; Bright and Lallier 2010; Childress and Girguis 2011; Hilário et al. 2011). With its  
33 enormous size (Fisher et al. 1988a; Hessler et al. 1988; Shank et al. 1998), rapid cell proliferation  
34 (Pflugfelder et al. 2009), seemingly fast growth (Lutz et al. 1994; Lutz et al. 2001), but short life  
35 (Klose et al. 2015) one of the most puzzling findings was the lack of a digestive system in an  
36 animal with a highly unusual body plan (Jones 1981). Descriptions of mouth- and gutless  
37 pogonophoran relatives go back a century (Caullery 1914). The first vestimentiferans  
38 *Lamellibrachia barhami* Webb, 1969 and *L. luymesii* van der Land and Nørrevang, 1975 were  
39 described already a few years earlier than *Riftia*. However, it was the discovery of *Riftia*, thriving in  
40 an apparently poisonous hydrothermal vent environment, which sparked the discovery of the first-  
41 described chemosynthetic animal-microbe symbiosis (Cavanaugh et al. 1981); an association in  
42 which *Riftia*, without a mouth or a gut, relies on the sulphide oxidizing chemoautotrophic symbionts  
43 for nutrition (Cavanaugh et al. 1981; Felbeck 1981; Rau 1981a; Rau 1981b) (Arp and Childress  
44 1981; Arp and Childress 1983).

45

46 Despite the fact that neither the animal host, nor the symbiont, nor the intact association are  
47 amenable to long-term cultivation, *Riftia* is easily one of the best studied deep-sea animals which  
48 have consistently led to major discoveries (reviewed by Bright and Lallier 2010). Crucial was the  
49 development of various devices to measure chemical and physical parameters directly in the deep  
50 sea to understand the abiotic conditions under which this tubeworm thrives at vigorous diffuse vent  
51 flow (Hessler et al. 1988; Shank et al. 1998; Luther et al. 2001; Le Bris et al. 2003; Mullineaux et al.  
52 2003; Le Bris, Govenar, et al. 2006; Le Bris, Rodier, et al. 2006). Unprecedented and equally  
53 important was the development of high-pressure flow-through systems to simulate *in situ*  
54 conditions in the lab (Quetin and Childress 1980; Girguis et al. 2000). There has been probably no  
55 deep-sea animal with more resourceful experimental approaches applied *in situ* and *ex situ* than  
56 *Riftia*, e.g. catheterised tubeworms under flow-through pressure (Felbeck and Turner 1995),  
57 artificial insemination and developmental studies under pressure (Marsh et al. 2001), predation  
58 experiments with mesh cages *in situ* (Micheli et al. 2002), hydraulically actuated collection devices  
59 of tubeworm aggregations (Hunt et al. 2004; Govenar et al. 2005), artificial plastic tube  
60 deployments (Govenar and Fisher 2007), pressurized experiments (Goffredi et al. 1997; Shillito et  
61 al. 1999; Girguis et al. 2000; Girguis et al. 2002), and finally, various *in situ* settlement devices for  
62 tubeworm larvae (Mullineaux et al. 2000; Nussbaumer et al. 2006; Mullineaux et al. 2020). These  
63 innovative experiments associated with four decades of research taught us about many aspects of  
64 *Riftia*'s evolution and biology.

65

66 After many microanatomical studies accompanied by heated, highly controversial phylogenetic  
67 discussions, the question of who the closest relatives of *Riftia* are was ultimately solved by  
68 traditional cladistic and novel molecular analyses (Fauchald and Rouse 1997; McHugh 1997;  
69 Halanych et al. 2001; Rouse 2001; Schulze 2002). They showed that vestimentiferans are  
70 lophotrochozoan polychaetae worms within Annelida (Fig. 1A) (Polychaeta, Siboglinidae,  
71 Vestimentifera) (Pleijel et al. 2009). Similar to many other polychaetes, *Riftia* is gonochoristic with  
72 internal fertilization and undergoes a biphasic life cycle with a pelagic phase including indirect  
73 development through spiral cleavage and a trochophore larvae (Marsh et al. 2001). The benthic  
74 phase is marked by the uptake of the symbiont into the metatrochophore larvae and growth into an  
75 adult, which completely reduces its mouth, gut, and anus. Instead, a unique mesodermal nutritional  
76 organ, the trophosome, functionally replaces the digestive system (Nussbaumer et al. 2006; Bright  
77 et al. 2013). The adult body is organized into four distinct regions, the obturacular region, the  
78 vestimentum, the trunk and the opisthosoma (Fig. 1B). The anterior obturacular region of the  
79 animal projects a vascularised branchial plume, which is responsible for the sequestration of  
80 nutrients and gas exchange, followed by the vestimentum, a muscular head region enclosing the  
81 heart, brain, the excretory organ, and the gonopores. The trunk region, the single elongated first  
82 segment, harbours the trophosome and the gonads. The posterior part, the opisthosoma, contains

83 a typical segmented annelid region with serially arranged chaetae (Bright et al. 2013). It is so far  
84 unknown how this unusual body plan lacking the entire digestive system is reflected in their  
85 developmental genes and signalling pathways. Gutless parasitic tapeworms, e.g. have lost many  
86 developmental genes including all ParaHox genes (Tsai et al. 2013).

87

88 The trophosome of *Riftia*, a soft multi-lobed and highly vascular tissue, houses a polyclonal  
89 endosymbiotic population dominated by one genotype of *Candidatus* Endoriftia persephone, a  
90 chemoautotrophic gammaproteobacteria (Robidart et al. 2008; Gardebrecht et al. 2012; Polzin et  
91 al. 2019) that oxidizes sulphur compounds via oxygen and nitrate and, in turn, harnesses that  
92 energy to fix dissolved inorganic carbon (or DIC, which includes carbon dioxide and bicarbonate) to  
93 organic matter. Briefly, the trophosome is far removed from the external environment, so the host  
94 presumably provides all of the inorganic nutrients to the symbionts. This primarily occurs via the  
95 highly vascular brachial plume, which takes up oxygen and hydrogen sulphide (H<sub>2</sub>S) from the  
96 external environment and transports these to the trophosome via a complex and unique  
97 complement of haemoglobins (Arp and Childress 1981; Arp and Childress 1983; Arp et al. 1987;  
98 Zal et al. 1996; Zal et al. 1997; Bailly et al. 2002; Flores et al. 2005). DIC is also taken up by *Riftia*,  
99 which is unusual as carbon dioxide is an animal respiratory waste product. However, in this case  
100 the worm must provide additional DIC to the symbionts for *net* carbon fixation, and does so by  
101 accumulating DIC in the blood (e.g. Goffredi et al. 1997; Goffredi et al. 1999). Moreover,  
102 physiological studies have shown that *Riftia* also takes up nitrate (also unusual for an animal), and  
103 in turn the symbionts reduce it to organic nitrogen (e.g. Hentschel et al. 1993; Girguis et al, 2000).  
104 In return, the host is nourished through the symbiont releasing organic matter and symbiont  
105 digestion, which occurs prior to bacteriocyte death in the periphery of the trophosome lobules  
106 (Felbeck 1985; Hand 1987; Felbeck and Jarchow 1998; Bright et al. 2000; Hinzke et al. 2019).  
107 Despite four decades of research, key questions about trophosome function remain, including but  
108 not limited to A) which of the two nutritional modes is more important (organic matter release or  
109 symbiont digestion; Bright et al. 2000) and B) the mechanisms that underlie organic nitrogen  
110 synthesis and distribution between the symbionts and the host.

111

112 Despite the highly derived annelid body plan, symbiotic lifestyle, and over forty years of extensive  
113 physiological research, whole genome information of *Riftia* has been lacking. Here, we generated a  
114 high-quality genome draft and distinct tissue-specific transcriptomes of the giant gutless tubeworm  
115 *Riftia*. By analysing the genome and transcriptomes of *Riftia* in a comparative framework, we  
116 highlight many evolutionary adaptations related to the obligate symbiotic lifestyle and survival in  
117 the deep-sea hydrothermal vent environment. The *Riftia* genome, together with a transcriptome  
118 and proteome study (Hinzke et al. 2019), a transcriptome study on the close relative *Ridgeia*  
119 *piscesae* (Nyholm et al. 2012), the genomic resources available for another close relative  
120 *Lamellibrachia luymesii* (Li et al. 2019) (short *Lamellibrachia*), and an extensive body of research

121 broadens our understanding of one of the most conspicuous models for host-symbiont interaction  
122 and of the biology of Vestimentifera. Most importantly, we show that the developmental gene  
123 repertoire is conserved, and that besides the well-known nutritional aspect of the trophosome, its  
124 mesodermal origin brought an inherited suite of functions such as, haematopoiesis, endosomal  
125 digestion of endosymbionts, and storage of excretory products likely adapted to serve host-  
126 symbiont physiological interactions. While the innate immune system apparently is little  
127 upregulated in the presence of the symbiont, it is highly active in the remaining body directly  
128 exposed, or connected through openings to, to the environment.

129

## 130 **Results and discussion**

131 ***Riftia* represents the most complete annelid genome to date including a complete**  
132 **mitogenome.** To assess the whole genome content of the giant tubeworm (Jones 1981), we  
133 sequenced a single individual from the hydrothermal vent site Tica, East Pacific Rise 9° 50' N  
134 region, with ~87-fold coverage using Pacific Biosciences Sequel system (Supplementary Figures  
135 1-3; Supplementary Table 1). We found the haploid genome size (560,7Mb with a N50 length of  
136 ~2,8Mb) to be smaller than previous genome-size estimates (Bonnivard et al. 2009) (Table 1-  
137 Supplementary Figure 4). The *Riftia* GC value is 40.49%, and the repeat content accounts for  
138 29.99% of the total length of the genome with most of the repetitive landscape dominated by  
139 interspersed and unclassified lineage-specific elements (35.2%) (Supplementary Figure 5). After  
140 genome post-processing, we identified a total of 25,984 protein coding genes with homologue,  
141 transcriptome, *ab-initio*, and gene expression evidence. The BUSCO4 (Simão et al. 2015) genome  
142 completeness score is 99.37%. These numbers render *Riftia* the most complete annelid genome to  
143 date (Simakov et al. 2013; Li et al. 2019; Martín-Durán et al. 2020) (Supplementary Figure 6).

144

145 The complete reconstruction of siboglinid mitochondrial genomes including the AT-rich control  
146 region has been notoriously difficult (Li et al. 2015). In this case, we were able to obtain it due to  
147 deep long read sequencing. The 15,406 bp circular mitochondrial genome contains all expected 13  
148 coding sequence genes, two ribosomal RNA genes and the 22 tRNAs, typical of bilaterian  
149 mitogenomes (Fig. 1C – Supplementary Figure 7) (Boore 1999). In contrast to two other *Riftia*  
150 reference mitogenomes (Jennings and Halanych 2005; Li et al. 2015), we recovered the full control  
151 region (D-loop), yielding a mitochondrial genome longer than those previously reported. The gene  
152 order and the number of genes are conserved among all three *Riftia* and other siboglinids  
153 reference mitogenomes, though there are size differences that are most likely due to the  
154 incomplete nature of previously published genomes.

155

156 **The developmental gene repertoire in gutless *Riftia* is conserved.** Because of the lack of  
157 molecular information on the development of cell types and the evolution of the vestimentiferan  
158 body plan, we identified and annotated a suite of key developmental genes and signalling pathway-

159 related genes in the giant tubeworm genome. We found that key genes involved in the  
160 development of the digestive tract in metazoans (Hejnol and Martín-Durán 2015; Nielsen et al.  
161 2018), such as *gooseoid*, *brachyury*, *foxA* and all three ParaHox genes, *xlox*, *cdx* and *gsx*,  
162 present in the *Riftia* and *Lamellibrachia* genomes (Supplementary Figure 8-10). The conservation  
163 of these genes in vestimentiferans is apparently not only crucial for developmental processes but  
164 also serves the microphagous nutrition in settled larvae until nourishment by the symbionts takes  
165 over in juveniles (Nussbaumer et al. 2006).

166  
167 The Hox cluster (~578kb in size – Fig. 2A), homeodomain-containing transcription factors with  
168 roles in anterior-posterior axial identity in metazoans (Pearson et al. 2005; Duboule 2007), is nearly  
169 intact and complete in the giant tubeworm genome (Supplementary Figures 8-9, Supplementary  
170 note 2). We did not identify *hox7* in *Riftia*, indicating a secondary loss of this gene in the giant  
171 tubeworm, a pattern also observed in other lophotrochozoan representatives such as phoronids  
172 (Luo et al. 2018) and bivalves (Gerdol et al. 2015; Calcino et al. 2019). *Hox7*, *lox2* and *lox5* are  
173 missing from *Lamellibrachia* genome suggesting a possible loss of the central Hox cluster  
174 elements (Fig. 2B) (Li et al. 2019). The Hox-like elements, homeotic genes equally important for  
175 body plan specification and developmental processes, *gbx*, *evx*, *mox*, *mnx*, *en* and *dlx* were also  
176 found in the giant tubeworm genome. *Engrailed (En)* and *even-skipped (Evx)* have 2 and 4 copies,  
177 respectively (Supplementary Figure 8).

178  
179 Few signalling pathways are required to control cell-to-cell interactions and produce the plethora of  
180 cell types and tissues in Metazoa (Pires-daSilva and Sommer 2003) among them TGF $\beta$ , Wnt,  
181 Notch and Hedgehog (Moustakas and Heldin 2009; Ingham et al. 2011; Holstein 2012; Massagué  
182 2012; Niehrs 2012; Gazave et al. 2017) (Supplementary Figures 11-15) The *Riftia* genome  
183 contains 14 TGF $\beta$  genes, including *nodal* and its antagonist *lefty*, the latter previously assumed to  
184 be a deuterostome innovation (Simakov et al. 2015). *Notch* and *hedgehog* are present as single  
185 copy genes in the *Riftia* genome as well as in *Lamellibrachia*, however, the *notch* receptor *jagged*  
186 is missing from both tubeworms. *Jagged* is present in the annelids *Capitella teleta*, *Helobdella*  
187 *robusta* and *Platynereis dumerilii* (Gazave et al. 2017), suggesting a secondary loss in  
188 Vestimentifera. Patched and dispatched genes, membrane receptors for the hedgehog ligand  
189 (Ingham et al. 2011) are present in *Riftia* with the dispatched genes expanded in vestimentiferans.  
190 In *Riftia*, we identified the 12 expected Wnt ligands (*Wnt3* has been shown to be lost in the  
191 Protostomia lineage) and their receptors frizzled, smoothed and sFRP (Holstein 2012). There is  
192 a genetic linkage of *Wnt1,6, 9* and *10* in *Riftia* akin to the gastropod *Lottia gigantea* and the fruit fly  
193 *Drosophila melanogaster* (Cho et al. 2010), reaffirming the ancient protostomian ancestral  
194 conserved linkage. The remaining eight Wnt genes in *Riftia* are disorganized on eight different  
195 scaffolds. Overall, despite the highly derived body plan, *Riftia* presents a deep conservation of the  
196 developmental gene toolkit akin to many distinct bilaterian animals.

197

198 **The *Riftia* genome is characterised by reductive evolution.** Multiple lines of evidence point to a  
199 relatively small genome, with gene family contractions exceeding expansions in *Riftia*, indicative of  
200 reductive evolution. The giant tubeworm genome is ~168Mb smaller than *Lamellibrachia*, its  
201 relative from cold hydrocarbon seeps whose genome is ~688 Mb with a N50 of 373kb (Li et al.  
202 2019)). The difference can be attributed to the increased number of repeat elements and protein  
203 coding genes in the cold seep tubeworm (38,998 gene models and repetitive content of 36.92%;  
204 Supplementary Note 1; Supplementary Figure 16).

205

206 To identify clusters of orthologous genes shared among the two vestimentiferans *Riftia* and  
207 *Lamellibrachia*, the polychaete *Capitella teleta* (herein called *Capitella*), and the clitellid *Helobdella*  
208 *robusta* (herein called *Helobdella*) (Simakov et al. 2013), we employed tree-based orthology  
209 inferences (Emms and Kelly 2019). The annelid core genome, the collection of orthogroups shared  
210 among the four annelids, contains 6,349 cluster of orthologous genes. Less than half of them  
211 represent the vestimentiferan core genome (2,883 orthogroups) shared between *Riftia* and  
212 *Lamellibrachia*. Interestingly, the number of shared orthogroups between the *Riftia-Helobdella* (17)  
213 and -*Capitella* (116) pairs are smaller than those between *Lamellibrachia-Helobdella* (89) and -  
214 *Capitella* (349) pairs, indicating that *Riftia* contains a more derived gene repertoire than its close  
215 relative *Lamellibrachia*.

216

217 To further investigate the important processes of gene losses and gains, known to shape animal  
218 evolution (Fernández and Gabaldón 2020; Guijarro-Clarke et al. 2020), identify expanded protein  
219 domains, taxonomically restricted genes, and positively selected genes in *Riftia*, we employed  
220 multi-level comparative approaches involving statistical analysis, taxon rich orthology inferences  
221 (N=36), and sensitive similarity searches (Supplementary Table 2; Supplementary Note 3). The  
222 *Riftia* genome shows a net reduction of gene numbers with only 734 expanded but 1,897  
223 contracted gene families, whereas the evolutionary history of *Lamellibrachia* is characterised by  
224 gene gains. Notably, the average expansion value of gene families in *Riftia* is the lowest among the  
225 four selected annelids herein analysed (Supplementary Figure 17). A total of 8,629 lineage-specific  
226 genes (~33.21% of the total) were identified in *Riftia*. Compared to the giant tubeworm,  
227 *Lamellibrachia* contains more lineage-specific genes (10,262 – 26.31% of the total).

228

229 The contracted gene families are not restricted to any specific biological process, as revealed by  
230 our gene ontology (GO) term enrichment analysis (N=18) (Supplementary Figure 18). Rather it  
231 appears that the giant tubeworm genome is undergoing a broad reduction in gene content (i.e.,  
232 reductive evolution). Among the contracted gene families are genes controlling the transcriptional  
233 machineries (Supplementary Figure 19; Supplementary Table 3). Transcription factors (TFs) are  
234 proteins with sequence specific DNA-binding domains that control gene transcription and tissue

235 identity (Schmitz et al. 2016). To gain understanding into the repertoire of TFs in *Riftia*, we  
236 annotated and classified genes in the tubeworm genome present in five major groups of TFs (bzip,  
237 homeobox, nuclear factor, bHLH and zinc-finger) with sensitive similarity searches. The giant  
238 tubeworm presents the lowest number of TFs within the analysed annelids (414), supporting our  
239 gene family analysis (discussed below). The cold-seep tubeworm genome contains a similar  
240 complement size as *Riftia* (423), with *Capitella* (551) and *Helobdella* (568) presenting a higher  
241 number of TF genes, comparatively. These results point to pervasive TF losses in the  
242 Vestimentifera lineage (Supplementary note 3).

243

244 **Expanded and lineage specific gene families in *Riftia*.** Despite overall genome reduction, the  
245 *Riftia* genome exhibits, there is also a variety of expanded gene families (Supplementary note 3;  
246 Supplementary Figure 20; Supplementary Table 4). These expanded families are enriched with GO  
247 terms associated with sulphur metabolism, membrane transport and detoxification of xenobiotic,  
248 e.g. foreign substances (xenobiotic transmembrane transporter activity, galactosylceramide  
249 sulfotransferase activity, CoA-transferase activity) (Gamage et al. 2006), detoxification of hydrogen  
250 peroxide as anti-oxidative stress response (glutathione catabolic and biosynthetic processes)  
251 (Espinosa-Diez et al. 2015), neurotransmitter- and ion channel-related functions (sodium symporter  
252 activity), oxygen transport (oxygen binding, haemoglobin complex), endosomal degradation  
253 (lysozyme activity), and secretion of chitin (chitin binding, protein glycosylation) (discussed with  
254 more details later).

255

256 Genes involved in the production of extracellular components of vestimentiferans such as the  
257 cuticle and the basal matrixes as well as the tube and chaetae (Gardiner and Jones 1994) were  
258 found in expanded families of *Riftia* (as well as *Lamellibrachia*), some of which are specific to either  
259 *Riftia* or *Lamellibrachia* (Supplementary note 3; Supplementary Figures 21-24; Supplementary  
260 Tables 5-6). The *Riftia* genome contains expanded protein domains related to several high-  
261 molecular mass proteins such as laminin, nidogen and collagen. These proteins are part of  
262 extracellular matrix secreted basally from epithelia, also known to regulate cellular activity and  
263 growth in other animals (Timpl and Brown 1996). In *Riftia*, extensive short collagen fibres are found  
264 below the epidermis, extending between muscles cells, and building the matrix of the obturaculum.  
265 In addition, long helically arranged collagen fibres are the main component of the cuticle apically  
266 secreted from the epidermis (Gardiner and Jones 1994). Importantly, many genes involved in chitin  
267 production, a biopolymer part of the hard protective tube secreted from pyriform glands of the  
268 vestimentum, trunk, body wall, and opisthosoma (Gardiner and Jones 1993), are taxonomically  
269 restricted to the *Riftia* lineage. Expectedly, we identified in the vestimentum and body wall tissues  
270 of *Riftia* several tissue-specific genes (TSGs) involved in the chitin metabolism responsible for the  
271 tube production as well as dissolution (Supplementary Figures 25-26). Although the specific gland  
272 type responsible for dissolution of tube material has yet to be identified, we suggest that in *Riftia*



273 the straight tube, that can reach up to three metres in length and five centimetres in diameter (Gail  
274 and Hunt 1986; Grassle 1987; Fisher et al. 1988b), can only widen in diameter to accommodate  
275 growth of the worm when tube material is dissolved and newly secreted, which agrees with the  
276 distribution of many TSG involved with tube biosynthesis. Overall, our findings of these expanding  
277 gene families as well as gene expression patterns underline the importance of chitin in *Riftia*, which  
278 is considered one of the fastest growing invertebrates (Lutz et al. 1994. Lutz et al. 2001). In order to  
279 achieve these high growth rates, *Riftia* needs to both digest and remodelate its own tube with  
280 astonishing speed.

281  
282 Furthermore, the multi-level comparative analyses revealed an enrichment of GO terms in the  
283 lineage specific *Riftia* genes involved with the control of the chromosome condensation and  
284 nucleosome assembly, and positively selected genes related to tumour suppression (*PIN2/TERF1*-  
285 interacting telomerase inhibitor) and transcription initiation (*TFIIB*- and *-D*) (Roeder 1996; Zhou and  
286 Lu 2001). Interestingly, in *Lamellibrachia smad4* (Li et al. 2019), which is a tumour suppressor and  
287 transcription factor, is under positive selection, suggesting a common vestimentiferan evolutionary  
288 adaption responsible for controlling the chromatin-remodelling events and the extraordinarily cell  
289 proliferation rates in these two tubeworms (Supplementary Table 7; Supplementary note 3)  
290 (Pflugfelder et al. 2009).

291  
292 The protein annotation of the rapidly evolving expanded gene families in *Riftia* identified members  
293 of the complement system involved in innate immunity and self-, non-self-recognition (sushi repeat  
294 domain-containing protein) (Kirkitadze and Barlow 2001). *Riftia* contains the greatest number of  
295 sushi-domain containing proteins among lophotrochozoans, presenting a total of 42 copies which  
296 are organised either in genomic clusters or dispersed as single elements throughout the genome  
297 (Supplementary Figure 4; Supplementary Figures 27). Of these, only 40 are shared with the cold  
298 seep tubeworm *Lamellibrachia*, pointing to a lineage-specific expansion at the base of  
299 Vestimentifera. Sushi genes, a common component of haemocytes (i.e., immune cells with  
300 phagocytic function (Pila et al. 2016), have been implicated in the mediation of the host-symbiont  
301 tolerance in the bobtail squid *Euprymna scolopes* – bioluminescent *Aliivibrio fischeri* association  
302 (McAnulty and Nyholm 2017). Although the rapid evolution of these proteins in *Riftia* and  
303 *Lamellibrachia* suggests similar evolutionary adaptations to the tubeworm/endosymbiont  
304 mutualism, the absence of any significant expressions in adult tissues rather point to their  
305 involvement in recognition of the symbiont during transmission in the larval stage or to potential  
306 pathogen recognition upregulated upon exposure.

307  
308 **Substrate transport for energy conservation and biosynthesis is supported by lineage-**  
309 **specific adaptations and parallel evolutionary events in *Riftia*.** As an adaptation to the  
310 sulphidic vent environment, and in support of a symbiotic lifestyle, the respiratory pigments in

311 *Riftia*, and other vestimentiferans such as *Lamellibrachia*, bind non-competitively and reversibly to  
312 oxygen and sulphide, simultaneously providing a key substrate for chemosynthesis by the  
313 symbionts while also averting the sulphidic inhibition of the hosts' mitochondrial oxidative chain  
314 reactions (Arp and Childress 1983; Terwilliger et al. 1985). Our previous gene family evolution  
315 analysis identified an expansion of haemoglobins in the giant tubeworm genome compared to  
316 other non-vestimentiferan lophotrochozoans (Supplementary Figure 21; Supplementary Table 6;  
317 Fig. 3A). Additionally, a recent genome study found a massive expansion of  $\beta$ 1-haemoglobin in the  
318 cold seep tubeworm *Lamellibrachia* (Li et al. 2019). To gain better insights in the evolution of Hb  
319 and linker genes in the Vestimentifera lineage, we employed thorough comparative genomics,  
320 phylogenetics, domain composition and gene quantification analyses. The genomic arrangement of  
321 the giant tubeworm Hb genes indicates that they were originated through a series of tandem  
322 duplications, totalling seven distinct genomic clusters (Fig. 3B). We annotated 26 extracellular Hbs  
323 and six linker genes in the *Riftia* genome (Supplementary Figures 28-29; Supplementary Note 4).  
324 Twenty-two Hb genes were phylogenetically placed in the  $\beta$ 1-Hb group, surpassing previous  
325 estimates of the  $\beta$ 1-Hb complement in the giant tubeworm (Bailly et al. 2002; Sanchez et al. 2007;  
326 Hinzke et al. 2019).  $\alpha$ 2- and  $\beta$ 2-Hbs are found as single copy genes, whereas  $\alpha$ 1-Hb group  
327 contains two paralogous genes. The sulphide-binding ability of the *Riftia* Hbs is associated with the  
328 occurrence of free cysteine residues in one  $\alpha$ 2 and one  $\beta$ 2 Hb genes (Bailly et al. 2002), as well as  
329 the formation of persulphide groups on linker chains (Zal et al. 1998; Bailly et al. 2002). Our results  
330 show that seven additional paralogous genes belonging to the  $\beta$ 1-Hb group contain the putative  
331 free-cysteine residues, which were confirmed through multiple sequence alignments and homology  
332 model generation (Supplementary Figures 30-31, Supplementary note 4). Additionally, it has been  
333 hypothesized that zinc ions, rather than free-cysteine residues, are responsible for the H<sub>2</sub>S binding  
334 and transport on vestimentiferan  $\alpha$ 2 chains (Flores et al. 2005). We identified the three conserved  
335 histidine residues (B12, B16 and G9), predicted to bind zinc moieties, in *Riftia* Hb genes. However,  
336 we observed variations within the *Lamellibrachia*  $\alpha$ 2 genes. A broader comparison of  $\alpha$ 2-Hb genes  
337 belonging to different annelid taxa challenged the hypothesis of zinc sulphide-binding mechanisms  
338 for H<sub>2</sub>S in siboglinids and vestimentiferans (Li et al. 2019). Our results, solely based on the  
339 conservation of histidine residues, corroborate Flores et al. (2005) hypothesis that zinc residues  
340 may be involved in the sequestration and transport of hydrogen sulphide at least on the giant  
341 tubeworm.

342

343 To investigate the gene expression dynamics of the newly and previously identified Hb paralogs in  
344 *Riftia*, we analysed published transcriptomes sampled from *Riftia*'s trophosomes containing  
345 sulphur-rich to sulphur-depleted symbionts (Hinzke et al. 2019). Hb gene expression showed great  
346 variation, indicating a more specialised role of the Hbs according to the environmental chemical  
347 fluctuations in the unstable deep-vent ecosystem (Fig. 3C, Supplementary note 4; Supplementary  
348 Table 8). Taken together, these results suggest a more complex system coordinating oxygen-

349 sulphide sequestration and distribution in the giant tubeworm tissues. The Hb complement of *Riftia*  
350 and *Lamellibrachia* are similar and unique among annelids and lophotrochozoans, in respect to  
351 gene numbers and distribution, indicating a Vestimentifera synapomorphy.

352

353 As the endosymbionts require carbon dioxide (CO<sub>2</sub>) for fixing inorganic carbon, the transport of  
354 CO<sub>2</sub> and the conversion of its alternative forms (e.g., bicarbonate; HCO<sub>3</sub><sup>-</sup>) is mediated by another  
355 class of enzymes, the carbonic anhydrases (CAs) (Shively et al. 1998; Cian et al. 2003). We found  
356 ten carbonic anhydrase genes in the *Riftia* genome, from which seven are tandemly arrayed in two  
357 genomic clusters (Supplementary Figure 32). A similar CA complement in *Riftia* (nine genes) was  
358 found in a recent study (Hinze et al. 2019). To better understand the diversity of CA genes we  
359 analysed tissue-specific transcriptomes and found at least five CA genes are membrane bound  
360 with three of them moderately/highly expressed in the trophosome, indicating that HCO<sub>3</sub><sup>-</sup>  
361 conversion to CO<sub>2</sub> and diffusion across the bacteriocyte membrane might be a common process in  
362 the trophosome, as suggested previously (Sanchez et al. 2007; Bright and Lallier 2010; Hinze et  
363 al. 2019). Tandem duplications and tissue-specific CA expression linked to the intracellular supply  
364 of CO<sub>2</sub> to endosymbionts have been recently reported in deep-sea bivalves (Ip et al. 2021),  
365 showing remarkable resemblance to our findings. Taken together, our results show that the  
366 transport of essential compounds to the chemoautotrophic endosymbionts and the maintenance of  
367 the mutualistic relationship is driven by lineage-specific and parallel evolutionary events.

368

369 **Trait and gene loss is compensated by the endosymbionts.** The loss of the digestive system  
370 requires nourishment through the symbiont. The mechanisms of carbon transfer between the  
371 endosymbiont and *Riftia* were shown to be through the fast release of fixed carbon from the  
372 symbiont and uptake into host tissue, as well as, through symbiont digestion prior death of the  
373 bacteriocytes (Felbeck 1985; Hand 1987; Felbeck and Jarchow 1998; Bright and Lallier 2010;  
374 Hinze et al. 2019). We found corroborating evidence for the uptake of released organic carbon  
375 from the symbiont based on the enrichment of GO terms and tissue specificity of succinate-  
376 semialdehyde complex genes and nuclear-encoded proteins of the inner mitochondrial membranes  
377 (including the tricarboxylate mitochondrial carrier responsible for the transport of succinate) (Majd  
378 et al. 2018) in the trophosome (Supplementary Figure 33; Supplementary Table 9). These results  
379 suggest an increased movement of cytosolic succinate through the mitochondrial membrane,  
380 possibly increasing the ATP production via the oxidative metabolism. These findings corroborate  
381 previous findings and support the involvement of this molecule for nourishment in *Riftia* from its  
382 endosymbiont (Felbeck and Jarchow 1998).

383

384 Evidence of digestion was revealed with tissue-specific transcriptome analyses which allowed us to  
385 identify the genes involved in the successive stages of lysosomal-associated degradation of  
386 symbionts (Supplementary Figure 33; Supplementary Tables 8). The expression of genes

387 associated with endosomal activity, the expression of several lysosomal-associated hydrolases  
388 (Supplementary Figures 34-35), vacuolar ATPases, and small Ras-related GTPases (rab genes)  
389 (Supplementary Figure 36; Supplementary Note 5) in the trophosome, is indicative of lysosomal-  
390 associated degradation of symbionts, as suggested earlier in ultrastructural studies, which describe  
391 the presence of primary lysosomes and symbionts in different lytic stages in *Riftia* (Bright et al.  
392 2000; Bright and Sorgo 2003; Hinzke et al. 2019). In addition, we detected specific genes in the  
393 trophosome which are associated with actin cytoskeleton dynamics (ARP2/3) known to be  
394 essential for endosomal dynamics (Kast and Dominguez 2017) (Supplementary Figure 33;  
395 Supplementary Table 9). Recent *de novo* tissue-specific transcriptomes and gene expression  
396 quantification of the host and symbiont support the digestive route of nutrition in *Riftia*/Endoriftia  
397 symbiosis (Hinzke et al., 2019).

398  
399 Furthermore, genes involved in the transport of fatty acyl units into the mitochondrial matrix (e.g.,  
400 carnitine/acylcarnitine carrier) (Indiveri et al. 2011), tricarboxylic acid (TCA) cycle, oxidative  
401 phosphorylation, antioxidant systems (i.e., superoxide dismutase II genes and methionine sulfoxide  
402 reductases) (Supplementary Figure 38), and key players of the fatty acid  $\beta$ -oxidation (Fig. 4A, B  
403 and C), showed tissue specificity in the trophosomal tissue (Supplementary Table 9;  
404 Supplementary note 5). Fatty acid  $\beta$ -oxidation is a central and deeply conserved energy-yielding  
405 process that fuels the TCA cycle and oxidative phosphorylation (Houten et al. 2016). As *Riftia* relies  
406 solely on its endosymbionts for sustenance, the metabolism of fatty acids in the trophosome is  
407 certainly linked to the bacterial digestion in this tissue, which is corroborated by a previous  
408 proteomic study (Hinzke et al. 2019). Altogether, the results point to different modes of nutrient  
409 transfer in the trophosome involving the translocation of released nutrients from symbiont to host  
410 through succinate, and the digestion of the symbionts by lysosomal enzymes followed by the  
411 degradation of fatty acids using the mitochondrial  $\beta$ -oxidation pathway.

412  
413 To further explore the extent to which degree *Riftia* is dependent on its endosymbiont for nutrition,  
414 we screened the genome of giant tubeworm and selected annelids for key enzymes related to  
415 amino acid biosynthesis (Supplementary Table 10). We found that *Riftia*, together with cold-seep  
416 tubeworm *Lamellibrachia* and the parasitic leech *Helobdella*, lacks many key enzymes related to  
417 amino acid biosynthesis when compared to close free-living polychaete relative *Capitella* (Fig. 4D).  
418 Genes involved with amino acid biosynthesis are constitutively expressed across the tubeworm  
419 tissues, with enzymes related to arginine and glycine metabolism highly expressed in the  
420 trophosome (Supplementary Figure 39). These findings suggest that loss of key enzymes in  
421 mutualistic vestimentiferans as well as a parasitic leech may be due to the beneficial and parasitic  
422 relationships, respectively allowing for compensated gene loss, compared to free-living  
423 polychaetes.

424

425 Overall, endosomal-associated digestion of endosymbionts seems to be a hallmark of intracellular  
426 digestion accomplished in the mesodermal trophosome of vestimentiferans, such as *Riftia* and  
427 *Lamellibrachia* (Nussbaumer et al. 2006; Hinzke et al. 2019; Li et al. 2019) (see also below). This  
428 process serves the host nutrition as well as the control of the symbiont population density during  
429 host growth, known from many other symbioses (Angela E. Douglas 2010). In addition, the  
430 symbiont provides the host with released organic carbon. While we do not know yet which partner  
431 controls this mode of nutritional translocation, both the evolutionary adaptation of endosymbiont  
432 digestion in a mesodermal tissue as well as carbon release contributed to trait loss in one partner  
433 compensated by the other (Ellers et al. 2012), and consequently has made *Riftia* obligatorily  
434 associated with its symbiont.

435  
436 **Haematopoiesis operates in the trophosome of *Riftia*.** Haematopoiesis, the production of blood  
437 cells and pigments is still a poorly understood process in vestimentiferans. The heart body, a  
438 mesodermal tissue in the dorsal blood vessel of vestimentiferans has been hypothesized to be the  
439 site of haemoglobin biosynthesis (Schulze 2002). The presence of many TSGs in the trophosome  
440 related to 5-aminolevulinic synthase, porphyrin metabolism, and metal ion binding indicate that  
441 this tissue harbours the enzymatic machinery necessary for haem biosynthesis. Haem is an  
442 integral part of haemoglobin molecules, which is synthesized in a seven multistep pathway that  
443 begins and ends in the mitochondrion. To fully characterise the haem biosynthesis pathway in the  
444 giant tubeworm, we screened the *Riftia* genome for the presence of the seven universal enzymes  
445 required to synthesize the haem (Supplementary Figure 40; Supplementary note 5). The giant  
446 tubeworm contains all the seven enzymes present as single copy in its genome with recognisable  
447 orthologs in the annelids *Lamellibrachia*, *Capitella* and *Helodbdella*. Gene expression analysis  
448 showed that the key enzymes present in the haem biosynthetic pathway are moderately/highly  
449 expressed in the trophosome, supporting the GO enrichment analysis (Supplementary Figure 40;  
450 Supplementary Figure 33). The haem biosynthesis in the trophosome is further corroborated by the  
451 presence of TSGs in this tissue related to phosphoserine aminotransferase and the mitochondrial  
452 coenzyme A transporter, which act as an important co-factor in the final step of haem synthesis and  
453 in the transport of coenzyme A into the mitochondria, respectively (Schneider et al. 2000;  
454 Fiermonte et al. 2009). These findings confirm the involvement of the mesodermal trophosome in  
455 haemoglobin metabolism and suggests that this organ is the site haematopoiesis. In the frenulate  
456 *Oligobrachia mashikoi*, the visceral mesoderm also strongly expresses globin subunits based on  
457 *in-situ* hybridisation and semi-quantitative RT-PCR (Nakahama et al. 2008), but in this siboglinid  
458 the visceral mesoderm is organized as simple peritoneum surrounding the endodermal  
459 trophosome (Southward 1993).

460  
461 **Excretory products are stored in the trophosome of *Riftia*.** The finding of TSGs in the  
462 trophosome related to the biosynthesis of nitrogen-containing compounds and in the transport of

463 ornithine (Supplementary Tables 9 and 11) agrees with the high levels of uric acid and urease  
464 activity in this host tissue, as previously reported (Cian et al. 2000; Minic and Hervé 2003). To  
465 explore the nitrogen metabolism pathways in *Riftia*, we identified and quantified the gene  
466 expression of several enzymes related to the purineolytic/uricolytic, purine/pyrimidine, taurine, and  
467 the polyamine pathways, as well as the urea and ammonia cycles (Supplementary Figures 41-45;  
468 Supplementary Note 6).

469

470 Most of the identified genes are found as single copy in the giant tubeworm genome  
471 (Supplementary Note 6; Supplementary Figures 41-45), however, we identified the presence of  
472 three chromosomal clusters harbouring glutamine synthetase, cytoplasmatic taurocyamine kinase  
473 and xanthine dehydrogenase/oxidase genes (Fig 5A). These enzymes are involved in the  
474 ammonia, urea and uricolytic pathways, respectively. *Riftia* and *Lamellibrachia* contain the highest  
475 number of glutamine synthetase genes in the herein investigated lophotrochozoan genomes (Fig.  
476 5B). Seven out of the nine glutamine synthetase genes present in *Riftia* belong to the group I and  
477 the remaining to the group II (Fig. 5C). Interestingly, only annelid orthologs are found to be  
478 phylogenetically close to the prokaryotic group I, indicating a secondary loss of this genes in the  
479 remaining lophotrochozoan lineages (see Supplementary Figure 43 for the expanded version of  
480 the phylogenetic tree). An expanded set of lengsin genes, an ancient class I glutamine synthetase  
481 family (Wyatt et al. 2006), is present in Vestimentifera (seven copies in *Riftia* and 13 in  
482 *Lamellibrachia*). Some members of the newly identified lengsins are also highly expressed in the  
483 trophosome, suggesting that these enzymes might play a role in mitigating toxicity of urea,  
484 ammonia, and other nitrogenous compounds (Wyatt et al. 2006).

485

486 The identification of five cytoplasmatic taurocyamine kinase genes, four organised in a genomic  
487 cluster (Fig. 5A), surpasses previous reports (in which only one cytoplasmatic gene was identified;  
488 Supplementary Figure 44) (Uda et al. 2005). In accordance with a recent study (Hinzke et al. 2019)  
489 and contrasting previous biochemical investigations on the *de novo* pyrimidine and polyamine  
490 biosynthesis in *Riftia* (Minic et al. 2001; Minic and Hervé 2003), we identified the trifunctional CAD  
491 protein in the genome of the tubeworm reinforcing the notion that *Riftia* can catalyse the first steps  
492 of the pyrimidine synthesis independently of its endosymbionts (Supplementary Note 6). These  
493 results are not unforeseen, since during the aposymbiotic phase (i.e., *Riftia*'s fertilised egg until the  
494 settled larva) pyrimidine metabolism plays a fundamental role in the development and growth of  
495 the animal.

496

497 We also found that the key enzymes of the uricolytic pathway and urea cycle are highly active in  
498 the trophosome (Supplementary Figure 41; Supplementary Table 8). These results are consistent  
499 with enzymatic/light micrograph studies, which show that the trophosome contains high  
500 concentration of ammonia, urea, creatinine, and uric acid crystals in the periphery of the lobules

501 (Cian et al. 2000), and with a more recent transcriptomic and metaproteomic study (Hintzke et al.  
502 2019). Surprisingly, we only identified in closed (De Oliveira, in review) and previous endosymbiont  
503 genome drafts the subunit-A of the urea transporter (*urtA*), with the four remaining subunits missing  
504 (*urtBCDE*) (Veaudor et al. 2019). Since all five subunits are required for a proper function of the  
505 urea transporter, these results challenge the idea of an active shuttle of urea from the host to the  
506 endosymbiont (Robidart et al. 2008).

507

508 **Cell proliferation and cell death interplay with innate immunity in *Riftia*.** To better understand  
509 how fast growth (Lutz et al. 1994) fuelled by high proliferation rates (Pflugfelder et al. 2009) and  
510 innate immunity act in *Riftia* in tissues exposed to the environment and in the endosymbiont-  
511 housing trophosome, we characterised the key molecular components, and their gene  
512 expressions, of important pathways related to cell cycle signalling (Supplementary Figure 46), Toll-  
513 like receptor/MyD88 (Supplementary Figures 47-49), as well as the apoptotic (Supplementary  
514 Figures 50-57) and autophagic (i.e. macroautophagy) cell death events (Supplementary Figures  
515 58). The *Riftia* genome similar to other investigated lophotrochozoans and closely related annelids  
516 harbours all the key components of these conserved pathways (Supplementary Note 7) (G. Zhang  
517 et al. 2012; Sun et al. 2017; Luo et al. 2018; Li et al. 2019; Ip et al. 2021). We did not identify any  
518 extensive remodelling (i.e., gene family expansions and contractions) of the immune (with the  
519 exception of sushi genes) and programmed cell death components in the giant tubeworm genome,  
520 as shown to be important in the maintenance of host-symbiont interactions in deep-sea mussels  
521 and clams (Sun et al. 2017; Ip et al. 2021).

522

523 Overall, *Riftia*'s gonad and plume tissues are highly active in cell proliferation and programmed cell  
524 death. Subject to potential pathogen infections through the gonopore opening and direct contact to  
525 the vent water (Jones 1981), respectively, these tissues show the entire suite of genes involved in  
526 the innate immunity recognition with TLRs, downstream cellular immune responses, as well as  
527 apoptosis, autophagy and endosomal-related genes. These results were additionally supported by  
528 the GO enrichment analyses in the female gonad and plume tissues (Supplementary Figures 59-  
529 60). The trophosome, in contrast, despite the remarkably high bacterial population density (Powell  
530 and Somero 1986; Bright and Sorgo 2003) does not show any striking upregulation of TLR for  
531 endosymbiont recognition, nor cell proliferation, nor programmed cell death pathways (at least not  
532 in the classical sense; see Hintzke et al., 2019). Instead, we found few moderately/highly  
533 expressed genes present in the immune system (*irak2* and 4, *tab1*, *tak1*, *mkk3/6*), cell cycle (cyclin  
534 A, B2, D2, *cdk4*), apoptotic (*cas2*, *cas8*, *birc8*), and autophagic (*becn1*, *atg2b-7-8-16*) pathways in  
535 the trophosome of *Riftia*. Interestingly, a previous study suggested that immune-related genes  
536 were significantly more expressed in the trophosome in relation to other symbiont-free tissues in  
537 the siboglinid *Ridgeia piscesae*, positing a more important role of the immune system in the host-  
538 endosymbiont homeostasis (Nyholm et al. 2012).

539

540 Few other individual components of the innate immune system, i.e., bactericidal permeability-  
541 increasing proteins and pattern recognition receptors, have been implicated in symbiont population  
542 control in tubeworms (Nyholm et al. 2012; Hinzke et al. 2019). However, based on our broad gene  
543 expression analyses, we argue that the host immune system does not play a major role in taming  
544 the endosymbiont population in the trophosome, as previously suggested (Hinzke et al. 2019).  
545 Furthermore, immunohistochemical and ultrastructural cell cycle analyses identified apoptotic and  
546 proliferative events in the trophosome (Pflugfelder et al. 2009), indicating that despite the overall  
547 low expression of gene markers related to these pathways described herein, these events occur in  
548 this tissue. In which extent these different pathways interact to shape the host/symbiont  
549 interactions and to maintain tissue homeostasis remains to be shown, however, it is clear that  
550 multiple and not mutually exclusive programmed cell-death, immune-related, and proliferative  
551 events (Supplementary note 7) are acting on the trophosome.

552

### 553 **From phenotype to genotype and back**

554 After 40 years of intensive research, we are now finally able to integrate the obtained genome and  
555 tissue-specific transcriptome information with the current body of knowledge on the phenotype to  
556 better understand the genotype-phenotype interplay in the giant tubeworm. The *Riftia pachyptila*  
557 genome is characterized by reductive evolution with broad gene family contractions exceeding  
558 gene family expansions. Compared to the close relative *Lamelibrachia luymesii* (*Lamelibrachia* live  
559 at longer-lived and less physiologically-taxing hydrocarbon seeps), *Riftia* exhibits a more derived  
560 gene repertoire for important traits related to symbiosis and the highly disturbed and stressful  
561 hydrothermal vent habitat they inhabit in the deep sea.

562

563 The mutualism between *Riftia* and its symbiont has not transited from individuality of symbiotic  
564 partners to a new integrated organism (Szathmáry and Smith 1995) because it lacks mutual  
565 dependency (Kiers and West 2015; West et al. 2015). *Riftia* is, in fact, one of the few examples  
566 known in which dependency is asymmetric with a facultative horizontally transmitted symbionts,  
567 which have the capacity to live with or without the host. The *Riftia* host, however, is obliged to  
568 partner with the symbiont or else they cannot thrive. Therefore, the host's fitness is strictly tied to  
569 the persistence of this association over ecological and evolutionary time scales. The genome data  
570 now clearly shows the peculiarities and divergencies in *Riftia*'s genotype compared to closely  
571 related free-living annelids and other lophotrochozoans, as well as which evolutionary adaptations  
572 of the host genotype ensure the maintenance of the association.

573

574 We found that despite the drastic morphological remodelling during its early development leading  
575 to the mouth-, gutless adult animal, *Riftia* retained the highly conserved developmental gene  
576 repertoire present in other lophotrochozoans and distant related animals. These results can be



577 interpreted as counterintuitive considering that the adult body plan alone provides little  
578 unambiguous evidence of the vestimentiferan phylogenetic relationship. These animals were  
579 initially compared to deuterostomes (Caullery 1914) and considered related to hemichordates  
580 (Beklemishev 1944) as well as protostomes, but so unique that new phyla were erected to  
581 accommodate them (i.e., Pogonophora and Vestimentifera) (reviewed by (Rouse 2001; Pleijel et  
582 al. 2009)). The conservation of the developmental gene toolkit probably reflects the developmental  
583 constraints into the necessary to go step by step through deterministic stereotypic spiral cleavage  
584 and larval development (Nielsen 2004). Akin to other polychaetes, the endoderm is necessary not  
585 only later for feeding functions, also seen in the metatrochophore larvae prior symbiont infection  
586 (Nussbaumer et al. 2006), but also to develop most mesodermal tissue.

587  
588 Combining the genomic information with tissue-specific transcriptomes allows us to hypothesize  
589 that the mesodermal trophosome (Nussbaumer et al. 2006; Bright et al. 2013) (Nussbaumer et al.  
590 2006; Bright et al. 2013) is a multi-functional organ with ancestral inherited functions such as  
591 haematopoiesis. This trait, we hypothesize belongs to the functional repertoire known from  
592 mesodermal chloragogen (extravasal tissue surrounding the gut and blood vessels) derived from  
593 the visceral mesoderm in annelids like the trophosome in vestimentiferans (Nussbaumer et al.  
594 2006; Bright et al. 2013). In fact, van der Land and Nørrevang suggested already in 1975, long  
595 before the symbionts were detected, that the trophosome in *Lammelibrachia luymesii* is the nutritive  
596 chloragogen tissue (Van der Land 1975). Although, overall knowledge is fragmentary it has been  
597 suggested that haematopoiesis in annelids is carried out by visceral as well as somatic mesoderm  
598 (Hartenstein 2006; Grigorian and Hartenstein 2013). In various polychaete species it was localized  
599 in particular in the (extravasal) chloragogen tissue, the (intravasal) heart body (Potswald 1969;  
600 Friedman and Weiss 1980; Braunbeck and Dales 1984; Fischer 1993) or the somatic peritoneum  
601 (Eckelbarger 1976). Our data unambiguously support the production of haemoglobin in the  
602 trophosome. Whether coelomocytes, known to be the immunocompetent cells of eucoelomates  
603 (Vetvicka and Sima 2009) including annelids (Dales 1964; Salzet et al. 2006; Cuvillier-Hot et al.  
604 2014), and the haemocytes also develop from trophosomal tissue appears to be likely but remains  
605 to be verified.

606  
607 The trophosome, however, further shows adaptations to new functions such as the well-known  
608 intracellular digestion through endosomal-like maturation of symbiosomes, as well as the  
609 processing of ammonia and storage of nitrogen waste analogous to the vertebrate liver. Most  
610 aquatic invertebrates, including annelids, are virtually ammoniotelic secreting ammonia (Larsen et  
611 al. 2011). Surprisingly, *Riftia* employs an additional ureotelic metabolism similar to terrestrial  
612 invertebrates and vertebrates converting toxic ammonia to urea/and or uric acid. Specifically, we  
613 found the entire set of genes for a complete urea cycle known to detoxify ammonia in the *Riftia*  
614 genome, with most of them upregulated in the trophosome. Therefore, we hypothesize that the

615 trophosome share similar functions to the liver of vertebrates: Instead of secreting nitrogenous  
616 waste products through kidneys like in vertebrates or nephridia in annelids, the trophosome was  
617 found to store large amounts of uric acid and urea. Uric acid and urea can be utilized as a  
618 bioavailable source of N via the catabolic arm of the urea cycle yielding  $\text{NH}_4^+$  and  $\text{CO}_2$ . Given the  
619 lack of urea transporters in the symbiont's genome, and the presence of active ureases in the  
620 trophosome host tissue, this suggests that both the synthesis and breakdown of uric acid and urea  
621 is under host control.

622

623 What factor(s) might lead to the evolution of this physiological capacity to sequester and  
624 metabolize urea and uric acid? It has been shown in other symbioses that the exchange of  
625 bioavailable N between symbiotic partners plays an important role in recycling bioavailable N, such  
626 as in coral-dinoflagellate symbiosis that show an almost complete retention of bioavailable N  
627 (Tanaka et al. 2018). At many deep-sea vents, including those where *Riftia* thrive, bioavailable N is  
628 limited as ammonium and free amino acids are found in pM concentrations (Johnson et al. 1988).  
629 Moreover, *Riftia* are unable to ingest particulate matter so they cannot derive nitrogen from  
630 detritus. However, an abundant source of N is nitrate, which is found in deep seawater and can be  
631 reduced to ammonium by some microbes (Girguis et al. 2000). Previous studies (Hentschel et al.  
632 1993; Girguis et al. 2000) found that *Riftia* take up nitrate from their environment, and the  
633 symbionts reduce nitrate to ammonium for symbiont and host growth and biosynthesis. However,  
634 the *Riftia* host's ability to produce urea means that it can sequester bioavailable N that is only  
635 available to the host. At first glance, limiting symbiont access to N might be considered a way to  
636 control symbiont growth, as seen in cnidarian-Symbiodiniaceae (Xiang et al. 2020). This latter  
637 scenario, however, seems unlikely as there is ample bioavailable N (in the form of ammonium)  
638 throughout the trophosome in both freshly collected and experimentally tested worms (De Cian et  
639 al. 2000; Girguis et al. 2000). Rather, it seems plausible that *Riftia*'s production of urea allows the  
640 host to store and sequester N in a stable, largely nontoxic form. Whether urea is mobilized and  
641 provided to the host and symbionts during time of low N availability has yet to be experimentally  
642 tested, but this physiological capacity is another example of the remarkable adaptations found within  
643 that host, which allow it to modulate the rapid environmental changes found at vents and continue  
644 to provide for its own and the symbionts' metabolic demands.

645

646 While the physiological and evolutionary aspects of tubeworm endosymbiosis have been  
647 sufficiently addressed over the past 40 years, the molecular mechanisms regulating host and  
648 symbiont interactions in siboglinids are still not fully understood. An immuno-centric view has been  
649 explored to explain the maintenance and regulation of the endosymbiont population in the giant  
650 tubeworm trophosome (Nyholm et al. 2012; Hinzke et al. 2019). Our results, contrary to the  
651 expectations, indicate that genes involved with the innate immune responses are downregulated in  
652 the trophosome (e.g., Toll-like receptor/MyD88) or in adult tubeworm tissues (e.g., sushi). These

653 results suggest that the innate immune system plays a more prominent role into the establishment  
654 of the symbiosis during the infection in the larval stage, rather than preservation of the mutualism  
655 during the juvenile/adult life cycle. The control of the endosymbiont population in the trophosome is  
656 mainly achieved by the upregulation of endosomal and lysosomal hydrolases resulting in the active  
657 digestion of the endosymbionts (a “mowing” process as described by Hinzke et al. 2019).

658

659 The giant tubeworm genome establishes a unique and unprecedented hallmark bridging more than  
660 four decades of physiological research in *Riftia*, whilst it simultaneously provides new insights into  
661 the development, whole organism function and evolution of one of the most studied models for  
662 metazoan-symbiont interaction. We envisage that the resources generated herein foster many  
663 hypothesis-driven research pointing towards a more complete understanding of the  
664 genotype/phenotype interface in the *Riftia* and closely related taxa.

665

## 666 **Methods**

667 A detailed methods section is available in Supplementary Material and methods and in  
668 Supplementary Figure 61. A brief overview of the bioinformatics pipeline follows below.

669

## 670 **Biological material and sequencing**

671 *Riftia* genome DNA was obtained from a piece of vestimentum tissue belonging to single worm  
672 collected at the hydrothermal vent site Tica, East Pacific Rise (Alvin dive 4839, 9° 50.398 N, 104°  
673 17.506 W, 2514 m depth, 2016) (Supplementary Figures 1, 2). PacBio libraries were generated  
674 with Sequel technology using the purified *Riftia* DNA. Tissue-specific transcriptomes were obtained  
675 from two specimens collected at Guaymas Basin, one female from the vent site Rebecca’s Roost  
676 (SuBastian dive 231, 27° 0.645 N, 111° 24.418 W, 2012 m depth, 2019) and one male from a vent  
677 site close to Big Pagoda (SuBastian dive 233, 27° 0.823 N, 111° 24.663 W, 2015 m depth, 2019)  
678 (Supplementary Figures 1, 2). The eight stranded paired-end tissue-specific transcriptomes (2x150  
679 pb) were sequenced using Illumina NovaSeq SP technology.

680

## 681 **Genome assembly and processing**

682 The five *Riftia* PacBio libraries were mapped against a custom database built with *Riftia*  
683 mitochondrial genome and its complete Endoriftia genome using minimap v2.17-r941 (Li 2018).  
684 Genome assembly was performed with canu v1.8 (Koren et al. 2017) with optimised parameters.  
685 Genome pre-processing, polishing, haplotig removal and contamination screening, was performed  
686 with arrow v2.3.3 (<https://github.com/pacificbiosciences/genomicconsensus>), purge\_dups  
687 ([https://github.com/dfguan/purge\\_dups](https://github.com/dfguan/purge_dups)) and blobtools v1.1.1 (Laetsch and Blaxter 2017),  
688 respectively. Mitochondrial and endosymbiont genome assemblies were executed with flye v2.5  
689 (Kolmogorov et al. 2019). Annotation of the mitochondrial genome was performed with MITOS2  
690 and GeSeq (Bernt et al. 2013; Tillich et al. 2017).

691

## 692 **Transcriptome assembly and processing**

693 The removal of adapter sequences and quality filtering of reads from the raw transcriptome  
694 databases was performed with bbduk v38.42 (<https://sourceforge.net/projects/bbmap/>). *De novo*  
695 and genome-guided transcriptome assemblies were performed with transabyss v2.0.1 and STAR  
696 v2.7.1a – Stringtie v2.0.6, respectively (Robertson et al. 2010; Dobin et al. 2013; Kovaka et al.  
697 2019). Possible Endoriftia contamination was removed from the transcriptomes using blastn  
698 v2.8.1+ (Camacho et al. 2009). A global *de novo* transcriptome was generated with corset and  
699 Lace (<https://github.com/Oshlack/Lace>) (Davidson and Oshlack 2014).

700

## 701 **Gene prediction and annotation**

702 The repeat landscape of *Riftia* genome was identified combining a custom giant tubeworm  
703 RepeatModeler v2.0 library followed by the masking of the repetitive elements with RepeatMasker  
704 v4.0.9 (A.F.A Smit, R. Hubley & P. Green, *RepeatMasker Open-4.0*). *Ab initio* gene prediction was  
705 performed with Augustus v3.3.3 aided with hint files (Stanke and Morgenstern 2005; Hoff and  
706 Stanke 2018). Only gene models with homology, orthology and gene expression evidence were  
707 kept. Protein annotation was performed with Interproscan v5.39-77.0, RNAscan-SE 2.0.5, signalP  
708 v5.0b and pfam\_scan.pl (Jones et al. 2014; Lowe and Chan 2016; Almagro Armenteros et al.  
709 2019).

710

## 711 **Identification of gene toolkits in *Riftia***

712 *Riftia* protein sequences were searched against well-curated catalog of developmental genes,  
713 amino and fatty acid biosynthesis, endocytosis-, apoptosis, autophagy- and immune-related genes  
714 using blastp v2.8.1+ and KEGG Automatic Annotation server (<https://www.genome.jp/kegg/kaas/>)  
715 (Moriya et al. 2007). Additionally, protein domain information was retrieved from pfam\_scan.pl and  
716 Interpro results. Homology of the identified genes was confirmed through phylogenetic inferences  
717 using iqtree v1.6.11 combining ModelFinder, tree search, 1000 ultra-fast bootstrap and SH-aLRT  
718 test replicates (Nguyen et al. 2015; Kalyaanamoorthy et al. 2017; Hoang et al. 2018). The protein  
719 diagrams were drawn using IBS v.1.0.3 software (Liu et al. 2015), and the clustered heatmaps  
720 generated with the R package pheatmap (v1.0.12). Quantification of the gene expression levels  
721 was performed with kallisto v0.46.1 (Bray et al. 2016).

722

## 723 **Orthology, gene family analysis and positively selected genes**

724 To assess *Riftia*, *Lamellibrachia* and Annelida lineage-specific genes orthology inferences using  
725 selected non-bilaterian, deuterostome, lophotrochozoan, ecdysozoans, representatives (N=36)  
726 were performed with Orthofinder v2.3.8 (Emms and Kelly 2019). To identify statistically significant

727 gene family expansions/contractions in *Riftia* compared to other lophotrochozoans a second round  
728 of orthology was performed using 18 lophotrochozoan representatives and *Tribolium castaneum* as  
729 outgroup. Finally, to identify the gene family core within Annelida a last instance of orthofinder  
730 v2.3.8 was invoked using the *C. teleta*, *H. robusta*, *L. luymesii* and *R. pachyptila*. Only the longest  
731 isoform for each gene was used in the analysis. Non-synonymous (Ka) and synonymous (Ks)  
732 substitution rates were calculated with the stand-alone version of KaKs\_calculator v.2 and HyPhy  
733 v. 2.5.15 (Pond et al. 2005; Wang et al. 2010; Z. Zhang et al. 2012). Only single-copy genes (1:1  
734 orthologs) without any inconsistencies between the nucleotide and protein sequences were used in  
735 the analyses. Contracted and expanded gene families in the giant tubeworm genome were  
736 identified using CAFE v4.2.1 (De Bie et al. 2006; Han et al. 2013) using a calibrated starting tree  
737 produced by Phylobayes v4.1b (Lartillot et al. 2013). The contracted/expanded gene families were  
738 annotated with Interproscan v5.39-77.0 and the enrichment analysis for Gene Ontology was  
739 performed with topGO v2.36.0 using Fisher's exact test against the *R. pachyptila* background (i.e.,  
740 complete set of *Riftia* genes) coupled with weight01 algorithm. Rapidly evolving gene families in  
741 *Riftia* were annotated using PANTHER HMM scoring tool v2.2 with PANTHER\_hmmscore  
742 database v15 (Mi et al. 2017). Protein domain contractions and expansions were found using  
743 iterative two-tailed Fisher's exact (Supplementary File 2) test applied to pfam\_scan.pl results. The  
744 obtained p-values were corrected using Benjamini and Hochberg method (Benjamini and  
745 Hochberg 1995) and only domains with a significant p-value of < 0.01 were further investigated.

746

#### 747 **Haemoglobin evolution**

748 The predicted *Riftia* haemoglobin (Hb) protein sequences were interrogated for the presence of the  
749 globin domain (PF00042) with hmalign v3.1b2 (Mistry et al. 2013) and proteins without a hit were  
750 excluded from the analyses. Manual inspection and characterisation of the signature diagnostic  
751 residues/motifs in the haemoglobin chain and linker sequences were performed following previous  
752 works (Belato et al. 2019). Phylogenetic analyses were carried out as described in "Identification of  
753 gene toolkits in *Riftia*". The resulting trees were midpoint rooted using Figtree  
754 (<http://tree.bio.ed.ac.uk/software/figtree/>). Additionally, to investigate the haemoglobin gene  
755 expression across different environmental conditions (sulphur rich, sulphur depleted and medium)  
756 we downloaded six publicly available trophosome transcriptomes from SRA  
757 (<https://www.ncbi.nlm.nih.gov/sra>) (accession numbers: SRR8949066 to SRR8949071). The  
758 transcriptome libraries were pre-processed as described in "Transcriptome assembly and  
759 processing". *Riftia* Hb sequence was modelled using the Prime program implemented in the  
760 Schrödinger Drug Discovery (v2020.2) software suite. All illustrations of structures were made with  
761 PyMol v2.4 (<https://pymol.org/2/>).

762

#### 763 **Comparative tissue-specific transcriptome**

764 The *Riftia* transcriptome libraries were pseudoaligned against the merged filtered AUGUSTUS  
765 gene models with kallisto v.0.46.1 (Bray et al. 2016) to collect the gene expression data expressed  
766 as TPM counts (transcripts per million). Normalisation within and across tissues were  
767 independently performed before calculating the tissue specificity tau values (see  
768 <https://rdrr.io/github/roonysgalbi/tispec/f/vignettes/>). To mitigate possible sex-specific differences in  
769 the gene expression levels, tau calculations were performed using only the tubeworm female  
770 tissues. The absolutely tissue-specific genes (genes expressed only in a single tissue defined by a  
771 tau value of 1) were submitted to enrichment analyses for Gene Ontology with topGO as  
772 mentioned in “Orthology, gene family analysis and positively selected genes”.

773

#### 774 **Data availability**

775 The raw long and short reads used to generate the draft genome and tissue-specific  
776 transcriptomes, respectively, are available in the SRA database under the BioProject number  
777 PRJNA754493 (Supplementary Table 12).

778

#### 779 **Acknowledgments**

780 We thank Christian Baranyi (University of Vienna) and Jennifer Delaney (Harvard University) for  
781 the technical support on the RNA/DNA extraction and purification protocols, respectively. We also  
782 thank the Vienna BioCenter Core Facilities and the Genomics Center of the University of  
783 Minnesota for the generation of *Riftia*'s “omics” data. Andre Luiz de Oliveira (ALO) thanks Thales  
784 Kronenberger (Universität Klinikum Tübingen) for the help with the haemoglobin 3D homology  
785 modelling. ALO also thanks Andrew Calcino and Salvador Espada Hinojosa for their constructive  
786 conversations during the development of this work, and finally Bruna Yuri Pinheiro Imai for her  
787 continuous support to the first author. This work was funded by the Austrian FWF project P 31543  
788 granted to M.B.

789

#### 790 **Author contributions**

791 ALO, MB and PG designed the project. ALO generated, implemented, and executed all the  
792 bioinformatic pipelines. All data analysis was performed by ALO with input from MB and PG, and  
793 JM. ALO wrote the first complete draft of this manuscript and all authors read, commented on, and  
794 approved the final version.

795

#### 796 **References**

797 Almagro Armenteros JJ, Tsirigos KD, Sønderby CK, Petersen TN, Winther O, Brunak S, von Heijne  
798 G, Nielsen H. 2019. SignalP 5.0 improves signal peptide predictions using deep neural  
799 networks. *Nat. Biotechnol.* 37:420–423.

- 800 Angela E. Douglas. 2010. *The Symbiotic Habit*. Princeton University Press Available from:  
801 <https://press.princeton.edu/books/paperback/9780691113425/the-symbiotic-habit>
- 802 Arp AJ, Childress JJ. 1981. Blood Function in the Hydrothermal Vent Vestimentiferan Tube Worm.  
803 *Science* 213:342–344.
- 804 Arp AJ, Childress JJ. 1983. Sulfide Binding by the Blood of the Hydrothermal Vent Tube Worm  
805 *Riftia pachyptila*. *Science* 219:295–297.
- 806 Arp AJ, Childress JJ, Vetter RD. 1987. The Sulphide-Binding Protein in the Blood of the  
807 Vestimentiferan Tube-Worm, *Riftia Pachyptila*, is the Extracellular Haemoglobin. *J. Exp.*  
808 *Biol.* 128:139–158.
- 809 Bailly X, Jollivet D, Vanin S, Deutsch J, Zal F, Lallier F, Toulmond A. 2002. Evolution of the Sulfide-  
810 Binding Function Within the Globin Multigenic Family of the Deep-Sea Hydrothermal Vent  
811 Tubeworm *Riftia pachyptila*. *Mol. Biol. Evol.* 19:1421–1433.
- 812 Bartolomaeus Thomas, Quast B. 2005. Structure and development of nephridia in Annelida and  
813 related taxa. In: Bartolomaeus T., Purschke G, editors. *Morphology, Molecules, Evolution*  
814 *and Phylogeny in Polychaeta and Related Taxa*. Developments in Hydrobiology. Dordrecht:  
815 Springer Netherlands. p. 139–165. Available from: [https://doi.org/10.1007/1-4020-3240-4\\_9](https://doi.org/10.1007/1-4020-3240-4_9)
- 816 Beklemishev VN. 1944. Osnovy sravnitel'noi anatomii bespozvonochnykh. [Principles of the  
817 comparative anatomy of invertebrates. *Mosc. Akad. Nauk* [Internet] 698. Available from:  
818 <https://www.marinespecies.org/aphia.php?p=sourcedetails&id=66718>
- 819 Belato FA, Schrago CG, Coates CJ, Halanych KM, Costa-Paiva EM. 2019. Newly Discovered  
820 Occurrences and Gene Tree of the Extracellular Globins and Linker Chains from the Giant  
821 Hexagonal Bilayer Hemoglobin in Metazoans. Eyre-Walker A, editor. *Genome Biol. Evol.*  
822 11:597–612.
- 823 Benjamini Y, Hochberg Y. 1995. Controlling the False Discovery Rate: A Practical and Powerful  
824 Approach to Multiple Testing. *J. R. Stat. Soc. Ser. B Methodol.* 57:289–300.
- 825 Bernt M, Donath A, Jühling F, Externbrink F, Florentz C, Fritzsche G, Pütz J, Middendorf M, Stadler  
826 PF. 2013. MITOS: Improved de novo metazoan mitochondrial genome annotation. *Mol.*  
827 *Phylogenet. Evol.* 69:313–319.
- 828 Bonnivard E, Catrice O, Ravaux J, Brown SC, Higuier D. 2009. Survey of genome size in 28  
829 hydrothermal vent species covering 10 families. *Genome* 52:524–536.
- 830 Boore JL. 1999. Animal mitochondrial genomes. *Nucleic Acids Res.* 27:1767–1780.

- 831 Braunbeck T, Dales RP. 1984. The role of the heart-body and of the extravasal tissue in disposal of  
832 foreign cells in two polychaete annelids. *Tissue Cell* 16:557–563.
- 833 Bray NL, Pimentel H, Melsted P, Pachter L. 2016. Near-optimal probabilistic RNA-seq  
834 quantification. *Nat. Biotechnol.* 34:525–527.
- 835 Bright M, Eichinger I, von Salvini-Plawen L. 2013. The metatrochophore of a deep-sea  
836 hydrothermal vent vestimentiferan (Polychaeta: Siboglinidae). *Org. Divers. Evol.* 13:163–  
837 188.
- 838 Bright M, Keckeis H, Fisher CR. 2000. An autoradiographic examination of carbon fixation, transfer  
839 and utilization in the *Riftia pachyptila* symbiosis. *Mar. Biol.* 136:621–632.
- 840 Bright M, Lallier F. 2010. The biology of vestimentiferan tubeworms. In: Gibson, RN, Atkinson, RJA,  
841 Gordon, JDM, editors. *Oceanography and Marine Biology: An animal review, Vol 48.* Vol.  
842 48. Oceanography and Marine Biology. CRC PRESS-TAYLOR & FRANCIS GROUP. p.  
843 213–265. Available from: <https://hal.archives-ouvertes.fr/hal-01250932>
- 844 Bright M, Sörgo A. 2003. Ultrastructural reinvestigation of the trophosome in adults of *Riftia*  
845 *pachyptila* (Annelida, Siboglinidae). *Invertebr. Biol.* 122:347–368.
- 846 Calcino AD, de Oliveira AL, Simakov O, Schwaha T, Zieger E, Wollesen T, Wanninger A. 2019. The  
847 quagga mussel genome and the evolution of freshwater tolerance. *DNA Res.* 26:411–422.
- 848 Camacho C, Coulouris G, Avagyan V, Ma N, Papadopoulos J, Bealer K, Madden TL. 2009.  
849 BLAST+: architecture and applications. *BMC Bioinformatics* 10:421.
- 850 Caullery M. 1914. Sur les Siboglinidae, type nouveau d'invertébrés recueillis par l'expédition du  
851 Siboga. *Bull. Société Zool. Fr.*:350–353.
- 852 Cavanaugh CM, Gardiner SL, Jones ML, Jannasch HW, Waterbury JB. 1981. Prokaryotic Cells in  
853 the Hydrothermal Vent Tube Worm *Riftia pachyptila* Jones: Possible Chemoautotrophic  
854 Symbionts. *Science* 213:340–342.
- 855 Childress JJ, Fisher CR. 1992. The biology of hydrothermal vent animals: physiology, biochemistry,  
856 and autotrophic symbioses. *Unkn. J.*:337–441.
- 857 Childress JJ, Girguis PR. 2011. The metabolic demands of endosymbiotic chemoautotrophic  
858 metabolism on host physiological capacities. *J. Exp. Biol.* 214:312–325.
- 859 Cho S-J, Vallès Y, Giani VC, Seaver EC, Weisblat DA. 2010. Evolutionary Dynamics of the wnt  
860 Gene Family: A Lophotrochozoan Perspective. *Mol. Biol. Evol.* 27:1645–1658.



- 861 Cian M-CD, Bailly X, Morales J, Strub J-M, Dorsselaer AV, Lallier FH. 2003. Characterization of  
862 carbonic anhydrases from *Riftia pachyptila*, a symbiotic invertebrate from deep-sea  
863 hydrothermal vents. *Proteins Struct. Funct. Bioinforma.* 51:327–339.
- 864 Cian MD, Regnault M, Lallier FH. 2000. Nitrogen metabolites and related enzymatic activities in the  
865 body fluids and tissues of the hydrothermal vent tubeworm *Riftia pachyptila*. *J. Exp. Biol.*  
866 203:2907–2920.
- 867 Corliss JB, Dymond J, Gordon LI, Edmond JM, von Herzen RP, Ballard RD, Green K, Williams D,  
868 Bainbridge A, Crane K, et al. 1979. Submarine Thermal Springs on the Galápagos Rift.  
869 *Science* 203:1073–1083.
- 870 Cuvillier-Hot V, Boidin-Wichlacz C, Tasiemski A. 2014. Polychaetes as annelid models to study  
871 ecoimmunology of marine organisms.
- 872 Dales RP. 1964. The Coelomocytes of the Terebellid Polychaete *Amphitrite Johnstoni*. *J. Cell Sci.*  
873 s3-105:263–279.
- 874 Davidson NM, Oshlack A. 2014. Corset: enabling differential gene expression analysis for de  
875 novoassembled transcriptomes. *Genome Biol.* 15:410.
- 876 De Bie T, Cristianini N, Demuth JP, Hahn MW. 2006. CAFE: a computational tool for the study of  
877 gene family evolution. *Bioinformatics* 22:1269–1271.
- 878 De Cian M-C, Regnault M, Lallier F. 1997. Nitrogenous metabolites in tissues and circulating fluids  
879 of *Riftia pachyptila*. *Cah. Biol. Mar.* [Internet]. Available from:  
880 <http://www.vliz.be/en/imis?refid=66292>
- 881 Dobin A, Davis CA, Schlesinger F, Drenkow J, Zaleski C, Jha S, Batut P, Chaisson M, Gingeras  
882 TR. 2013. STAR: ultrafast universal RNA-seq aligner. *Bioinformatics* 29:15–21.
- 883 Duboule D. 2007. The rise and fall of Hox gene clusters. *Development* 134:2549–2560.
- 884 Eckelbarger KJ. 1976. Larval Development and Population Aspects of the Reef-Building  
885 Polychaete *Phragmatopoma lapidosa* from the East Coast of Florida. *Bull. Mar. Sci.*  
886 26:117–132.
- 887 Ellers J, Kiers ET, Currie CR, McDonald BR, Visser B. 2012. Ecological interactions drive  
888 evolutionary loss of traits. *Ecol. Lett.* 15:1071–1082.
- 889 Emms DM, Kelly S. 2019. OrthoFinder: phylogenetic orthology inference for comparative  
890 genomics. *Genome Biol.* 20:238.

- 891 Espinosa-Diez C, Miguel V, Mennerich D, Kietzmann T, Sánchez-Pérez P, Cadenas S, Lamas S.  
892 2015. Antioxidant responses and cellular adjustments to oxidative stress. *Redox Biol.*  
893 6:183–197.
- 894 Fauchald K, Rouse G. 1997. Polychaete systematics: Past and present. *Zool. Scr.* 26:71–138.
- 895 Felbeck H. 1981. Chemoautotrophic Potential of the Hydrothermal Vent Tube Worm, *Riftia*  
896 *pachyptila* Jones (Vestimentifera). *Science* 213:336–338.
- 897 Felbeck H. 1985. CO<sub>2</sub> Fixation in the Hydrothermal Vent Tube Worm *Riftia pachyptila* (Jones).  
898 *Physiol. Zool.* 58:272–281.
- 899 Felbeck H, Jarchow J. 1998. Carbon release from purified chemoautotrophic bacterial symbionts of  
900 the hydrothermal vent tubeworm *Riftia pachyptila*. *Physiol. Zool.* 71:294–302.
- 901 Felbeck H, Turner PJ. 1995. CO<sub>2</sub> transport in catheterized hydrothermal vent tubeworms, *Riftia*  
902 *pachyptila* (vestimentifera). *J. Exp. Zool.* 272:95–102.
- 903 Fernández R, Gabaldón T. 2020. Gene gain and loss across the metazoan tree of life. *Nat. Ecol.*  
904 *Evol.* 4:524–533.
- 905 Fiermonte G, Paradies E, Todisco S, Marobbio CMT, Palmieri F. 2009. A Novel Member of Solute  
906 Carrier Family 25 (SLC25A42) Is a Transporter of Coenzyme A and Adenosine 3',5'-  
907 Diphosphate in Human Mitochondria \*. *J. Biol. Chem.* 284:18152–18159.
- 908 Fischer E. 1993. The myelo-erythroid nature of the chloragogenous-like tissues of the annelids.  
909 *Comp. Biochem. Physiol. A Physiol.* 106:449–453.
- 910 Fisher CR, Childress JJ, Arp AJ, Brooks JM, Distel D, Favuzzi JA, Macko SA, Newton A, Powell  
911 MA, Somero GN, et al. 1988a. Physiology, morphology, and biochemical composition of  
912 *Riftia pachyptila* at Rose Garden in 1985. *Deep Sea Res. Part Oceanogr. Res. Pap.*  
913 35:1745–1758.
- 914 Fisher CR, Childress JJ, Arp AJ, Brooks JM, Distel D, Favuzzi JA, Macko SA, Newton A, Powell  
915 MA, Somero GN, et al. 1988b. Physiology, morphology, and biochemical composition of  
916 *Riftia pachyptila* at Rose Garden in 1985. *Deep Sea Res. Part Oceanogr. Res. Pap.*  
917 35:1745–1758.
- 918 Flores JF, Fisher CR, Carney SL, Green BN, Freytag JK, Schaeffer SW, Royer WE. 2005. Sulfide  
919 binding is mediated by zinc ions discovered in the crystal structure of a hydrothermal vent  
920 tubeworm hemoglobin. *Proc. Natl. Acad. Sci.* 102:2713–2718.

- 921 Friedman MM, Weiss L. 1980. An electron microscopic study of hemoglobin synthesis in the  
922 marine annelid, *Amphitrite ornata* (Polychaeta: Terebellidae). *J. Morphol.* 164:121–138.
- 923 Gaill F, Hunt S. 1986. Tubes of deep sea hydrothermal vent worms *Riftia pachyptila*  
924 (*Vestimentifera*) and *Alvinella pompejana* (Annelida). *Mar. Ecol. Prog. Ser.* 34:267–274.
- 925 Gamage N, Barnett A, Hempel N, Duggleby RG, Windmill KF, Martin JL, McManus ME. 2006.  
926 Human Sulfotransferases and Their Role in Chemical Metabolism. *Toxicol. Sci.* 90:5–22.
- 927 Gardebrecht A, Markert S, Sievert SM, Felbeck H, Thürmer A, Albrecht D, Wollherr A, Kabisch J,  
928 Le Bris N, Lehmann R, et al. 2012. Physiological homogeneity among the endosymbionts  
929 of *Riftia pachyptila* and *Tevnia jerichonana* revealed by proteogenomics. *ISME J.* 6:766–  
930 776.
- 931 Gardiner SL, Jones ML. 1993. Microscopic anatomy of invertebrates. Wiley-Liss New York
- 932 Gardiner SL, Jones ML. 1994. On the Significance of Larval and Juvenile Morphology for  
933 Suggesting Phylogenetic Relationships of the Vestimentifera. *Am. Zool.* 34:513–522.
- 934 Gazave E, Lemaître QIB, Balavoine G. 2017. The Notch pathway in the annelid *Platynereis*:  
935 insights into chaetogenesis and neurogenesis processes. *Open Biol.* [Internet] 7. Available  
936 from: <https://www.ncbi.nlm.nih.gov/pmc/articles/PMC5356439/>
- 937 Gerdol M, Venier P, Pallavicini A. 2015. The genome of the Pacific oyster *Crassostrea gigas* brings  
938 new insights on the massive expansion of the C1q gene family in Bivalvia. *Dev. Comp.*  
939 *Immunol.* 49:59–71.
- 940 Girguis PR, Lee RW, Desaulniers N, Childress JJ, Pospesel M, Felbeck H, Zal F. 2000. Fate of  
941 nitrate acquired by the tubeworm *Riftia pachyptila*. *Appl. Environ. Microbiol.* 66:2783–2790.
- 942
- 943 Girguis PR, Childress JJ, Freytag JK, Klose K, Stuber R. 2002. Effects of metabolite uptake on  
944 proton-equivalent elimination by two species of deep-sea vestimentiferan tubeworm, *Riftia*  
945 *pachyptila* and *Lamellibrachia cf. luymesii*: proton elimination is a necessary adaptation to  
946 sulfide-oxidizing chemoautotrophic symbionts. *J. Exp. Biol.* 205:3055–3066.
- 947 Goffredi S, Childress J, Desaulniers N, Lee R, Lallier F, Hammond DO. 1997. Inorganic carbon  
948 acquisition by the hydrothermal vent tubeworm *Riftia pachyptila* depends upon high  
949 external PCO<sub>2</sub> and upon proton-equivalent ion transport by the worm. *The Journal of*  
950 *Experimental Biology.* 200(5):883-96.

- 951 Goffredi SK, Girguis PR, Childress JJ, Desaulniers NT. 1999. Physiological functioning of carbonic  
952 anhydrase in the hydrothermal vent tubeworm *Riftia pachyptila*. *The Biological Bulletin*.  
953 196(3):257-264.
- 954 Govenar B, Fisher CR. 2007. Experimental evidence of habitat provision by aggregations of *Riftia*  
955 *pachyptila* at hydrothermal vents on the East Pacific Rise. *Mar. Ecol.* 28:3–14.
- 956 Govenar B, Le Bris N, Gollner S, Glanville J, Aperghis A, Hourdez S, Fisher C. 2005. Epifaunal  
957 community structure associated with *Riftia pachyptila* aggregations in chemically different  
958 hydrothermal vent habitats. *Mar. Ecol. Prog. Ser.* 305:67–77.
- 959 Grassle JF. 1987. The Ecology of Deep-Sea Hydrothermal Vent Communities. In: Blaxter JHS,  
960 Southward AJ, editors. *Advances in Marine Biology*. Vol. 23. Academic Press. p. 301–362.  
961 Available from: <https://www.sciencedirect.com/science/article/pii/S0065288108601108>
- 962 Grigorian M, Hartenstein V. 2013. Hematopoiesis and hematopoietic organs in arthropods. *Dev.*  
963 *Genes Evol.* 223:103–115.
- 964 Guijarro-Clarke C, Holland PWH, Paps J. 2020. Widespread patterns of gene loss in the evolution  
965 of the animal kingdom. *Nat. Ecol. Evol.* 4:519–523.
- 966 Halanych KM, Feldman RA, Vrijenhoek RC. 2001. Molecular Evidence that *Sclerolium brattstromi*  
967 Is Closely Related to Vestimentiferans, not to Frenulate Pogonophorans (Siboglinidae,  
968 Annelida). *Biol. Bull.* 201:65–75.
- 969 Han MV, Thomas GWC, Lugo-Martinez J, Hahn MW. 2013. Estimating Gene Gain and Loss Rates  
970 in the Presence of Error in Genome Assembly and Annotation Using CAFE 3. *Mol. Biol.*  
971 *Evol.* 30:1987–1997.
- 972 Hand SC. 1987. Trophosome ultrastructure and the characterization of isolated bacteriocytes from  
973 invertebrate-sulfur bacteria symbioses. *Biol. Bull.* 173:260–276.
- 974 Hartenstein V. 2006. Blood Cells and Blood Cell Development in the Animal Kingdom. *Annu. Rev.*  
975 *Cell Dev. Biol.* 22:677–712.
- 976 Hejnal A, Martín-Durán JM. 2015. Getting to the bottom of anal evolution. *Zool. Anz. - J. Comp.*  
977 *Zool.* 256:61–74.
- 978 Hentschel U, Felbeck H. 1993. Nitrate respiration in the hydrothermal vent tubeworm *Riftia*  
979 *pachyptila*. *Nature*. 366(6453):338-40.

- 980 Hessler RR, Smithey WM, Boudrias MA, Keller CH, Lutz RA, Childress JJ. 1988. Temporal change  
981 in megafauna at the Rose Garden hydrothermal vent (Galapagos Rift; eastern tropical  
982 Pacific). *Deep Sea Res. Part Oceanogr. Res. Pap.* 35:1681–1709.
- 983 Hilário A, Capa M, Dahlgren TG, Halanych KM, Little CTS, Thornhill DJ, Verna C, Glover AG. 2011.  
984 New Perspectives on the Ecology and Evolution of Siboglinid Tubeworms. Laudet V, editor.  
985 *PLoS ONE* 6:e16309.
- 986 Hinzke T, Kleiner M, Breusing C, Felbeck H, Häsler R, Sievert SM, Schlüter R, Rosenstiel P,  
987 Reusch TBH, Schweder T, et al. 2019. Host-Microbe Interactions in the Chemosynthetic  
988 *Riftia pachyptila* Symbiosis. 10:20.
- 989 Hoang DT, Chernomor O, von Haeseler A, Minh BQ, Vinh LS. 2018. UFBoot2: Improving the  
990 Ultrafast Bootstrap Approximation. *Mol. Biol. Evol.* 35:518–522.
- 991 Hoff KJ, Stanke M. 2018. Predicting Genes in Single Genomes with AUGUSTUS. *Curr. Protoc.*  
992 *Bioinforma.*:e57.
- 993 Holstein TW. 2012. The Evolution of the Wnt Pathway. *Cold Spring Harb. Perspect. Biol.* [Internet]  
994 4. Available from: <https://www.ncbi.nlm.nih.gov/pmc/articles/PMC3385961/>
- 995 Houten SM, Violante S, Ventura FV, Wanders RJA. 2016. The Biochemistry and Physiology of  
996 Mitochondrial Fatty Acid  $\beta$ -Oxidation and Its Genetic Disorders. *Annu. Rev. Physiol.* 78:23–  
997 44.
- 998 Hunt HL, Metaxas A, Jennings RM, Halanych KM, Mullineaux LS. 2004. Testing biological control  
999 of colonization by vestimentiferan tubeworms at deep-sea hydrothermal vents (East Pacific  
1000 Rise, 9°50'N). *Deep Sea Res. Part Oceanogr. Res. Pap.* 51:225–234.
- 1001 Indiveri C, Iacobazzi V, Tonazzi A, Giangregorio N, Infantino V, Convertini P, Console L, Palmieri F.  
1002 2011. The mitochondrial carnitine/acylcarnitine carrier: Function, structure and  
1003 physiopathology. *Mol. Aspects Med.* 32:223–233.
- 1004 Ingham PW, Nakano Y, Seger C. 2011. Mechanisms and functions of Hedgehog signalling across  
1005 the metazoa. *Nat. Rev. Genet.* 12:393–406.
- 1006 Ip JC-H, Xu T, Sun J, Li R, Chen C, Lan Y, Han Z, Zhang H, Wei J, Wang H, et al. 2021. Host-  
1007 Endosymbiont Genome Integration in a Deep-Sea Chemosymbiotic Clam. *Mol. Biol. Evol.*  
1008 [Internet]. Available from: [https://academic.oup.com/mbe/advance-](https://academic.oup.com/mbe/advance-article/doi/10.1093/molbev/msaa241/5909661)  
1009 [article/doi/10.1093/molbev/msaa241/5909661](https://academic.oup.com/mbe/advance-article/doi/10.1093/molbev/msaa241/5909661)

- 1010 Jennings RM, Halanych KM. 2005. Mitochondrial Genomes of *Clymenella torquata* (Maldanidae)  
1011 and *Riftia pachyptila* (Siboglinidae): Evidence for Conserved Gene Order in Annelida. *Mol.*  
1012 *Biol. Evol.* 22:210–222.
- 1013 Jones ML. 1981. *Riftia pachyptila* Jones: Observations on the Vestimentiferan Worm from the  
1014 Galápagos Rift. *Science* 213:333–336.
- 1015 Jones P, Binns D, Chang H-Y, Fraser M, Li W, McAnulla C, McWilliam H, Maslen J, Mitchell A,  
1016 Nuka G, et al. 2014. InterProScan 5: genome-scale protein function classification.  
1017 *Bioinformatics* 30:1236–1240.
- 1018 Kalyaanamoorthy S, Minh BQ, Wong TKF, von Haeseler A, Jermiin LS. 2017. ModelFinder: fast  
1019 model selection for accurate phylogenetic estimates. *Nat. Methods* 14:587–589.
- 1020 Kast DJ, Dominguez R. 2017. The Cytoskeleton–Autophagy Connection. *Curr. Biol.* 27:R318–  
1021 R326.
- 1022 Kiers ET, West SA. 2015. Evolving new organisms via symbiosis. *Science* 348:392–394.
- 1023 Kirkitadze MD, Barlow PN. 2001. Structure and flexibility of the multiple domain proteins that  
1024 regulate complement activation. *Immunol. Rev.* 180:146–161.
- 1025 Klose J, Polz MF, Wagner M, Schimak MP, Gollner S, Bright M. 2015. Endosymbionts escape dead  
1026 hydrothermal vent tubeworms to enrich the free-living population. *Proc. Natl. Acad. Sci.*  
1027 112:11300–11305.
- 1028 Kolmogorov M, Yuan J, Lin Y, Pevzner PA. 2019. Assembly of long, error-prone reads using repeat  
1029 graphs. *Nat. Biotechnol.* 37:540–546.
- 1030 Koren S, Walenz BP, Berlin K, Miller JR, Bergman NH, Phillippy AM. 2017. Canu: scalable and  
1031 accurate long-read assembly via adaptive *k*-mer weighting and repeat separation. *Genome*  
1032 *Res.* 27:722–736.
- 1033 Kovaka S, Zimin AV, Pertea GM, Razaghi R, Salzberg SL, Pertea M. 2019. Transcriptome  
1034 assembly from long-read RNA-seq alignments with StringTie2. *Genome Biol.* 20:278.
- 1035 Laetsch DR, Blaxter ML. 2017. BlobTools: Interrogation of genome assemblies. *F1000Research*  
1036 6:1287.
- 1037 Larsen EH, Deaton LE, Onken H, O'Donnell M, Grosell M, Dantzler WH, Weihrauch D. 2011.  
1038 Osmoregulation and excretion. *Compr. Physiol.* 4:405–573.

- 1039 Lartillot N, Rodrigue N, Stubbs D, Richer J. 2013. PhyloBayes MPI: Phylogenetic Reconstruction  
1040 with Infinite Mixtures of Profiles in a Parallel Environment. *Syst. Biol.* 62:611–615.
- 1041 Le Bris N, Govenar B, Le Gall C, Fisher CR. 2006. Variability of physico-chemical conditions in  
1042 9°50'N EPR diffuse flow vent habitats. *Mar. Chem.* 98:167–182.
- 1043 Le Bris N, Rodier P, Sarradin P-M, Le Gall C. 2006. Is temperature a good proxy for sulfide in  
1044 hydrothermal vent habitats? *Cah. Biol. Mar.* 47:465–470.
- 1045 Le Bris N, Sarradin P-M, Caprais J-C. 2003. Contrasted sulphide chemistries in the environment of  
1046 13°N EPR vent fauna. *Deep Sea Res. Part Oceanogr. Res. Pap.* 50:737–747.
- 1047 Li H. 2018. Minimap2: pairwise alignment for nucleotide sequences. Biroi I, editor. *Bioinformatics*  
1048 34:3094–3100.
- 1049 Li Y, Kocot KM, Schander C, Santos SR, Thornhill DJ, Halanych KM. 2015. Mitogenomics reveals  
1050 phylogeny and repeated motifs in control regions of the deep-sea family Siboglinidae  
1051 (Annelida). *Mol. Phylogenet. Evol.* 85:221–229.
- 1052 Li Y, Tassia MG, Waits DS, Bogantes VE, David KT, Halanych KM. 2019. Genomic adaptations to  
1053 chemosymbiosis in the deep-sea seep-dwelling tubeworm *Lamellibrachia luymesii*. *BMC*  
1054 *Biol.* 17:91.
- 1055 Liu W, Xie Y, Ma J, Luo X, Nie P, Zuo Z, Lahrmann U, Zhao Q, Zheng Y, Zhao Y, et al. 2015. IBS:  
1056 an illustrator for the presentation and visualization of biological sequences. *Bioinformatics*  
1057 31:3359–3361.
- 1058 Lowe TM, Chan PP. 2016. tRNAscan-SE On-line: integrating search and context for analysis of  
1059 transfer RNA genes. *Nucleic Acids Res.* 44:W54–W57.
- 1060 Luo Y-J, Kanda M, Koyanagi R, Hisata K, Akiyama T, Sakamoto H, Sakamoto T, Satoh N. 2018.  
1061 Nemertean and phoronid genomes reveal lophotrochozoan evolution and the origin of  
1062 bilaterian heads. *Nat. Ecol. Evol.* 2:141–151.
- 1063 Luther GW, Rozan TF, Taillefert M, Nuzzio DB, Di Meo C, Shank TM, Lutz RA, Cary SC. 2001.  
1064 Chemical speciation drives hydrothermal vent ecology. *Nature* 410:813–816.
- 1065 Lutz RA, Shank TM, Evans R. 2001. Life After Death in the Deep Sea: Following immolation by  
1066 volcanic eruption, the community around a hydrothermal vent recovers spectacularly. *Am.*  
1067 *Sci.* 89:422–431.
- 1068 Lutz RA, Shank TM, Fornari DJ, Haymon RM, Lilley MD, Von Damm KL, Desbruyeres D. 1994.  
1069 Rapid growth at deep-sea vents. *Nature* 371:663–664.

- 1070 Majd H, King MS, Smith AC, Kunji ERS. 2018. Pathogenic mutations of the human mitochondrial  
1071 citrate carrier SLC25A1 lead to impaired citrate export required for lipid, dolichol,  
1072 ubiquinone and sterol synthesis. *Biochim. Biophys. Acta BBA - Bioenerg.* 1859:1–7.
- 1073 Marsh AG, Mullineaux LS, Young CM, Manahan DT. 2001. Larval dispersal potential of the  
1074 tubeworm *Riftia pachyptila* at deep-sea hydrothermal vents. *Nature* 411:77–80.
- 1075 Martín-Durán JM, Vellutini BC, Marlétaz F, Cetrangolo V, Cvetesic N, Thiel D, Henriët S, Grau-  
1076 Bové X, Carrillo-Baltodano AM, Gu W, et al. 2020. Conservative route to genome  
1077 compaction in a miniature annelid. *Nat. Ecol. Evol.*
- 1078 Massagué J. 2012. TGF $\beta$  signalling in context. *Nat. Rev. Mol. Cell Biol.* 13:616–630.
- 1079 McAnulty SJ, Nyholm SV. 2017. The Role of Hemocytes in the Hawaiian Bobtail Squid, *Euprymna*  
1080 *scolopes*: A Model Organism for Studying Beneficial Host–Microbe Interactions. *Front.*  
1081 *Microbiol.* [Internet] 7. Available from:  
1082 <https://www.ncbi.nlm.nih.gov/pmc/articles/PMC5216023/>
- 1083 McHugh D. 1997. Molecular evidence that echiurans and pogonophorans are derived annelids.  
1084 *Proc. Natl. Acad. Sci. U. S. A.* 94:8006–8009.
- 1085 Mi H, Huang X, Muruganujan A, Tang H, Mills C, Kang D, Thomas PD. 2017. PANTHER version  
1086 11: expanded annotation data from Gene Ontology and Reactome pathways, and data  
1087 analysis tool enhancements. *Nucleic Acids Res.* 45:D183–D189.
- 1088 Micheli F, Peterson CH, Mullineaux LS, Fisher CR, Mills SW, Sancho G, Johnson GA, Lenihan HS.  
1089 2002. Predation Structures Communities at Deep-Sea Hydrothermal Vents. *Ecol. Monogr.*  
1090 72:365–382.
- 1091 Minic Z, Hervé G. 2003. Arginine Metabolism in the Deep Sea Tube Worm *Riftia pachyptila* and Its  
1092 Bacterial Endosymbiont. *J. Biol. Chem.* 278:40527–40533.
- 1093 Minic Z, Simon V, Penverne B, Gaill F, Hervé G. 2001. Contribution of the Bacterial Endosymbiont  
1094 to the Biosynthesis of Pyrimidine Nucleotides in the Deep-sea Tube Worm *Riftia pachyptila*.  
1095 *J. Biol. Chem.* 276:23777–23784.
- 1096 Mistry J, Finn RD, Eddy SR, Bateman A, Punta M. 2013. Challenges in homology search:  
1097 HMMER3 and convergent evolution of coiled-coil regions. *Nucleic Acids Res.* 41:e121–  
1098 e121.
- 1099 Moriya Y, Itoh M, Okuda S, Yoshizawa AC, Kanehisa M. 2007. KAAS: an automatic genome  
1100 annotation and pathway reconstruction server. *Nucleic Acids Res.* 35:W182–W185.



- 1101 Moustakas A, Heldin C-H. 2009. The regulation of TGF $\beta$  signal transduction. *Development*  
1102 136:3699–3714.
- 1103 Mullineaux LS, Fisher CR, Peterson CH, Schaeffer SW. 2000. Tubeworm succession at  
1104 hydrothermal vents: use of biogenic cues to reduce habitat selection error? *Oecologia*  
1105 123:275–284.
- 1106 Mullineaux LS, Mills SW, Le Bris N, Beaulieu SE, Sievert SM, Dykman LN. 2020. Prolonged  
1107 recovery time after eruptive disturbance of a deep-sea hydrothermal vent community. *Proc.*  
1108 *R. Soc. B Biol. Sci.* 287:20202070.
- 1109 Mullineaux LS, Peterson CH, Micheli F, Mills SW. 2003. Successional Mechanism Varies Along a  
1110 Gradient in Hydrothermal Fluid Flux at Deep-Sea Vents. *Ecol. Monogr.* 73:523–542.
- 1111 Nakahama S, Nakagawa T, Kanemori M, Fukumori Y, Sasayama Y. 2008. Direct evidence that  
1112 extracellular giant hemoglobin is produced in chloragogen tissues in a beard worm,  
1113 *Oligobranchia mashikoi* (Frenulata, Siboglinidae, Annelida). *Zoolog. Sci.* 25:1247–1252.
- 1114 Nelson D, Fisher C. 1995. Chemoautotrophic and methanotrophic endosymbiotic bacteria at deep-  
1115 sea vents and seeps. In: *The Microbiology of Deep-Sea Hydrothermal Vents*. Karl DM.  
1116 Boca Raton, FL: CRC. p. 125–167.
- 1117 Nguyen L-T, Schmidt HA, von Haeseler A, Minh BQ. 2015. IQ-TREE: A Fast and Effective  
1118 Stochastic Algorithm for Estimating Maximum-Likelihood Phylogenies. *Mol. Biol. Evol.*  
1119 32:268–274.
- 1120 Niehrs C. 2012. The complex world of WNT receptor signalling. *Nat. Rev. Mol. Cell Biol.* 13:767–  
1121 779.
- 1122 Nielsen C. 2004. Trochophora larvae: cell-lineages, ciliary bands, and body regions. 1. Annelida  
1123 and Mollusca. *J. Exp. Zoolog. B Mol. Dev. Evol.* 302:35–68.
- 1124 Nielsen C, Brunet T, Arendt D. 2018. Evolution of the bilaterian mouth and anus. *Nat. Ecol. Evol.*  
1125 2:1358–1376.
- 1126 Nussbaumer AD, Fisher CR, Bright M. 2006. Horizontal endosymbiont transmission in  
1127 hydrothermal vent tubeworms. *Nature* 441:345–348.
- 1128 Nyholm SV, Song P, Dang J, Bunce C, Girguis PR. 2012. Expression and Putative Function of  
1129 Innate Immunity Genes under in situ Conditions in the Symbiotic Hydrothermal Vent  
1130 Tubeworm *Ridgeia piscesae*. Leulier F, editor. *PLoS ONE* 7:e38267.

- 1131 Pearson JC, Lemons D, McGinnis W. 2005. Modulating Hox gene functions during animal body  
1132 patterning. *Nat. Rev. Genet.* 6:893–904.
- 1133 Pflugfelder B, Cary SC, Bright M. 2009. Dynamics of cell proliferation and apoptosis reflect  
1134 different life strategies in hydrothermal vent and cold seep vestimentiferan tubeworms. *Cell*  
1135 *Tissue Res.* 337:149–165.
- 1136 Pila EA, Sullivan JT, Wu XZ, Fang J, Rudko SP, Gordy MA, Hanington PC. 2016. Haematopoiesis  
1137 in molluscs: A review of haemocyte development and function in gastropods, cephalopods  
1138 and bivalves. *Dev. Comp. Immunol.* 58:119–128.
- 1139 Pires-daSilva A, Sommer RJ. 2003. The evolution of signalling pathways in animal development.  
1140 *Nat. Rev. Genet.* 4:39–49.
- 1141 Pleijel F, Dahlgren TG, Rouse GW. 2009. Progress in systematics: from Siboglinidae to  
1142 Pogonophora and Vestimentifera and back to Siboglinidae. *C. R. Biol.* 332:140–148.
- 1143 Polzin J, Arevalo P, Nussbaumer T, Polz MF, Bright M. 2019. Polyclonal symbiont populations in  
1144 hydrothermal vent tubeworms and the environment. *Proc. R. Soc. B Biol. Sci.*  
1145 286:20181281.
- 1146 Pond SLK, Frost SDW, Muse SV. 2005. HyPhy: hypothesis testing using phylogenies.  
1147 *Bioinformatics* 21:676–679.
- 1148 Potswald HE. 1969. Cytological observations on the so-called neoblasts in the serpulid *Spirorbis*.  
1149 *J. Morphol.* 128:241–259.
- 1150 Powell MA, Somero GN. 1986. Adaptations to Sulfide by Hydrothermal Vent Animals: Sites and  
1151 Mechanisms of Detoxification and Metabolism. *Biol. Bull.* 171:274–290.
- 1152 Quetin LB, Childress JJ. 1980. Observations on the swimming activity of two bathypelagic mysid  
1153 species maintained at high hydrostatic pressures. *Deep Sea Res. Part Oceanogr. Res.*  
1154 *Pap.* 27:383–391.
- 1155 Rau GH. 1981a. Low  $^{15}\text{N}/^{14}\text{N}$  in hydrothermal vent animals: ecological implications. *Nature*  
1156 289:484–485.
- 1157 Rau GH. 1981b. Hydrothermal Vent Clam and Tube Worm  $^{13}\text{C}/^{12}\text{C}$ : Further Evidence of  
1158 Nonphotosynthetic Food Sources. *Science* 213:338–340.
- 1159 Rimskaya-Korsakova NN, Karaseva NP, Temereva EN, Malakhov VV. 2018. Protonephridial  
1160 Excretory System in Vestimentifera (Siboglinidae, Annelida). *Dokl. Biol. Sci.* 478:22–25.

- 1161 Robertson G, Schein J, Chiu R, Corbett R, Field M, Jackman SD, Mungall K, Lee S, Okada HM,  
1162 Qian JQ, et al. 2010. De novo assembly and analysis of RNA-seq data. *Nat. Methods*  
1163 7:909–912.
- 1164 Robidart JC, Bench SR, Feldman RA, Novoradovsky A, Podell SB, Gaasterland T, Allen EE,  
1165 Felbeck H. 2008. Metabolic versatility of the *Riftia pachyptila* endosymbiont revealed  
1166 through metagenomics. *Environ. Microbiol.* 10:727–737.
- 1167 Roeder RG. 1996. The role of general initiation factors in transcription by RNA polymerase II.  
1168 *Trends Biochem. Sci.* 21:327–335.
- 1169 Rouse GW. 2001. A cladistic analysis of Siboglinidae Caullery, 1914 (Polychaeta, Annelida):  
1170 formerly the phyla Pogonophora and Vestimentifera. *Zool. J. Linn. Soc.* 132:55–80.
- 1171 Ruppert EE, Smith PR. 1988. The Functional Organization of Filtration Nephridia. *Biol. Rev.*  
1172 63:231–258.
- 1173 Salzet M, Tasiemski A, Cooper E. 2006. Innate Immunity in Lophotrochozoans: The Annelids. *Curr.*  
1174 *Pharm. Des.* 12:3043–3050.
- 1175 Sanchez S, Hourdez S, Lallier FH. 2007. Identification of proteins involved in the functioning of  
1176 *Riftia pachyptila* symbiosis by Subtractive Suppression Hybridization. *BMC Genomics*  
1177 8:337.
- 1178 Schmitz JF, Zimmer F, Bornberg-Bauer E. 2016. Mechanisms of transcription factor evolution in  
1179 Metazoa. *Nucleic Acids Res.* 44:6287–6297.
- 1180 Schneider G, Käck H, Lindqvist Y. 2000. The manifold of vitamin B6 dependent enzymes. *Structure*  
1181 8:R1–R6.
- 1182 Schulze A. 2001. Comparative anatomy of excretory organs in vestimentiferan tube worms  
1183 (Pogonophora, Obturata). *J. Morphol.* 250:1–11.
- 1184 Schulze A. 2002. Histological and ultrastructural characterization of the intravasal body in  
1185 Vestimentifera (Siboglinidae, Polychaeta, Annelida). Available from: [http://application.sb-](http://application.sb-roscoff.fr/cbm/doi/10.21411/CBM.A.CBEBBD63)  
1186 [roscoff.fr/cbm/doi/10.21411/CBM.A.CBEBBD63](http://application.sb-roscoff.fr/cbm/doi/10.21411/CBM.A.CBEBBD63)
- 1187 Shank TM, Fornari DJ, Von Damm KL, Lilley MD, Haymon RM, Lutz RA. 1998. Temporal and  
1188 spatial patterns of biological community development at nascent deep-sea hydrothermal  
1189 vents (9°50'N, East Pacific Rise). *Deep Sea Res. Part II Top. Stud. Oceanogr.* 45:465–515.
- 1190 Shillito B, Ravaux J, Gaill F, Delachambre J, Thiébaud E, Childress JJ. 1999. Preliminary data on  
1191 carbon production of deep-sea vent tubeworms. *Mar. Ecol. Prog. Ser.* 183:275–279.

- 1192 Shively JM, van Keulen G, Meijer WG. 1998. SOMETHING FROM ALMOST NOTHING: Carbon  
1193 Dioxide Fixation in Chemoautotrophs. *Annu. Rev. Microbiol.* 52:191–230.
- 1194 Simakov O, Kawashima T, Marlétaz F, Jenkins J, Koyanagi R, Mitros T, Hisata K, Bredeson J,  
1195 Shoguchi E, Gyoja F, et al. 2015. Hemichordate genomes and deuterostome origins.  
1196 *Nature* 527:459–465.
- 1197 Simakov O, Marletaz F, Cho S-J, Edsinger-Gonzales E, Havlak P, Hellsten U, Kuo D-H, Larsson T,  
1198 Lv J, Arendt D, et al. 2013. Insights into bilaterian evolution from three spiralian genomes.  
1199 *Nature* 493:526–531.
- 1200 Simão FA, Waterhouse RM, Ioannidis P, Kriventseva EV, Zdobnov EM. 2015. BUSCO: assessing  
1201 genome assembly and annotation completeness with single-copy orthologs. *Bioinformatics*  
1202 31:3210–3212.
- 1203 Southward E. 1993. Pogonophora. In: Microscopic Anatomy of Invertebrates, Onychophora,  
1204 Chilopoda and Lesser Protostomata. F.W. Harrison and M. E. Rice. Wiley-Liss New York. p.  
1205 327–369.
- 1206 Stanke M, Morgenstern B. 2005. AUGUSTUS: a web server for gene prediction in eukaryotes that  
1207 allows user-defined constraints. *Nucleic Acids Res.* 33:W465–W467.
- 1208 Stewart FJ, Cavanaugh CM. 2006. Symbiosis of Thioautotrophic Bacteria with *Riftia pachyptila*. In:  
1209 Overmann J, editor. Molecular Basis of Symbiosis. Vol. 41. Progress in Molecular and  
1210 Subcellular Biology. Berlin/Heidelberg: Springer-Verlag. p. 197–225. Available from:  
1211 [http://link.springer.com/10.1007/3-540-28221-1\\_10](http://link.springer.com/10.1007/3-540-28221-1_10)
- 1212 Sun J, Zhang Yu, Xu T, Zhang Yang, Mu H, Zhang Yanjie, Lan Y, Fields CJ, Hui JHL, Zhang W, et  
1213 al. 2017. Adaptation to deep-sea chemosynthetic environments as revealed by mussel  
1214 genomes. *Nat. Ecol. Evol.* 1:0121.
- 1215 Szathmáry E, Smith JM. 1995. The major evolutionary transitions. *Nature* 374:227–232.
- 1216 Tanaka Y, Suzuki A, Sakai K. 2018. The stoichiometry of coral-dinoflagellate symbiosis: carbon and  
1217 nitrogen cycles are balanced in the recycling and double translocation system. *ISME J.*  
1218 12:860–868.
- 1219 Terwilliger R, Terwilliger N, Bonaventura C, Bonaventura J, Schabtach E. 1985. Structural and  
1220 functional properties of hemoglobin from the vestimentiferan Pogonophora, Lamellibrachia.  
1221 *Biochim. Biophys. Acta BBA - Protein Struct. Mol. Enzymol.* 829:27–33.

- 1222 Tillich M, Lehwark P, Pellizzer T, Ulbricht-Jones ES, Fischer A, Bock R, Greiner S. 2017. GeSeq -  
1223 versatile and accurate annotation of organelle genomes. *Nucleic Acids Res.* 45:W6–W11.
- 1224 Timpl R, Brown JC. 1996. Supramolecular assembly of basement membranes. *BioEssays* 18:123–  
1225 132.
- 1226 Tsai IJ, Zarowiecki M, Holroyd N, Garciarubio A, Sanchez-Flores A, Brooks KL, Tracey A, Bobes  
1227 RJ, Fragoso G, Sciutto E, et al. 2013. The genomes of four tapeworm species reveal  
1228 adaptations to parasitism. *Nature* 496:57–63.
- 1229 Uda K, Tanaka K, Bailly X, Zal F, Suzuki T. 2005. Phosphagen kinase of the giant tubeworm *Riftia*  
1230 *pachyptila*: Cloning and expression of cytoplasmic and mitochondrial isoforms of  
1231 taurocyamine kinase. *Int. J. Biol. Macromol.* 37:54–60.
- 1232 Van der Land J. 1975. The systematic position of Lamellibrachia (Annelida, Vestimentifera). *Z.*  
1233 *Zool. Syst. Evol. Sonderh.* 1975:86–101.
- 1234 Veaudor T, Cassier-Chauvat C, Chauvat F. 2019. Genomics of Urea Transport and Catabolism in  
1235 Cyanobacteria: Biotechnological Implications. *Front. Microbiol.* [Internet] 10. Available from:  
1236 <https://www.ncbi.nlm.nih.gov/pmc/articles/PMC6737895/>
- 1237 Vetvicka V, Sima P. 2009. Origins and functions of annelide immune cells: the concise survey.  
1238 *Invertebr. Surviv. J.* 6:138–143.
- 1239 Wang D, Zhang Y, Zhang Z, Zhu J, Yu J. 2010. KaKs\_Calculator 2.0: A Toolkit Incorporating  
1240 Gamma-Series Methods and Sliding Window Strategies. *Genomics Proteomics*  
1241 *Bioinformatics* 8:77–80.
- 1242 West SA, Fisher RM, Gardner A, Kiers ET. 2015. Major evolutionary transitions in individuality.  
1243 *Proc. Natl. Acad. Sci.* 112:10112–10119.
- 1244 Wyatt K, White HE, Wang L, Bateman OA, Slingsby C, Orlova EV, Wistow G. 2006. Lengsin is a  
1245 survivor of an ancient family of class I glutamine synthetases in eukaryotes that has  
1246 undergone evolutionary re-engineering for a role in the vertebrate eye lens. *Struct. Lond.*  
1247 *Engl.* 1993 14:1823–1834.
- 1248 Xiang T, Lehnert E, Jinkerson RE, Clowez S, Kim RG, DeNofrio JC, Pringle JR, Grossman AR.  
1249 2020. Symbiont population control by host-symbiont metabolic interaction in  
1250 Symbiodiniaceae-cnidarian associations. *Nat. Commun.* 11:108.
- 1251 Zal F, Lallier FH, Green BN, Vinogradov SN, Toulmond A. 1996. The Multi-hemoglobin System of  
1252 the Hydrothermal Vent Tube Worm *Riftia pachyptila* II. COMPLETE POLYPEPTIDE CHAIN

- 1253 COMPOSITION INVESTIGATED BY MAXIMUM ENTROPY ANALYSIS OF MASS  
1254 SPECTRA. *J. Biol. Chem.* 271:8875–8881.
- 1255 Zal F, Leize E, Lallier FH, Toulmond A, Dorsselaer AV, Childress JJ. 1998. S-Sulfohemoglobin and  
1256 disulfide exchange: The mechanisms of sulfide binding by *Riftia pachyptila* hemoglobins.  
1257 *Proc. Natl. Acad. Sci.* 95:8997–9002.
- 1258 Zal F, Suzuki T, Kawasaki Y, Childress JJ, Lallier FH, Toulmond A. 1997. Primary structure of the  
1259 common polypeptide chain b from the multi-hemoglobin system of the hydrothermal vent  
1260 tube worm *Riftia pachyptila*: An insight on the sulfide binding-site. *Proteins Struct. Funct.*  
1261 *Bioinforma.* 29:562–574.
- 1262 Zhang G, Fang X, Guo X, Li L, Luo R, Xu F, Yang P, Zhang L, Wang X, Qi H, et al. 2012. The  
1263 oyster genome reveals stress adaptation and complexity of shell formation. *Nature* 490:49–  
1264 54.
- 1265 Zhang Z, Xiao J, Wu J, Zhang H, Liu G, Wang X, Dai L. 2012. ParaAT: A parallel tool for  
1266 constructing multiple protein-coding DNA alignments. *Biochem. Biophys. Res. Commun.*  
1267 419:779–781.
- 1268 Zhou XZ, Lu KP. 2001. The Pin2/TRF1-Interacting Protein PinX1 Is a Potent Telomerase Inhibitor.  
1269 *Cell* 107:347–359.

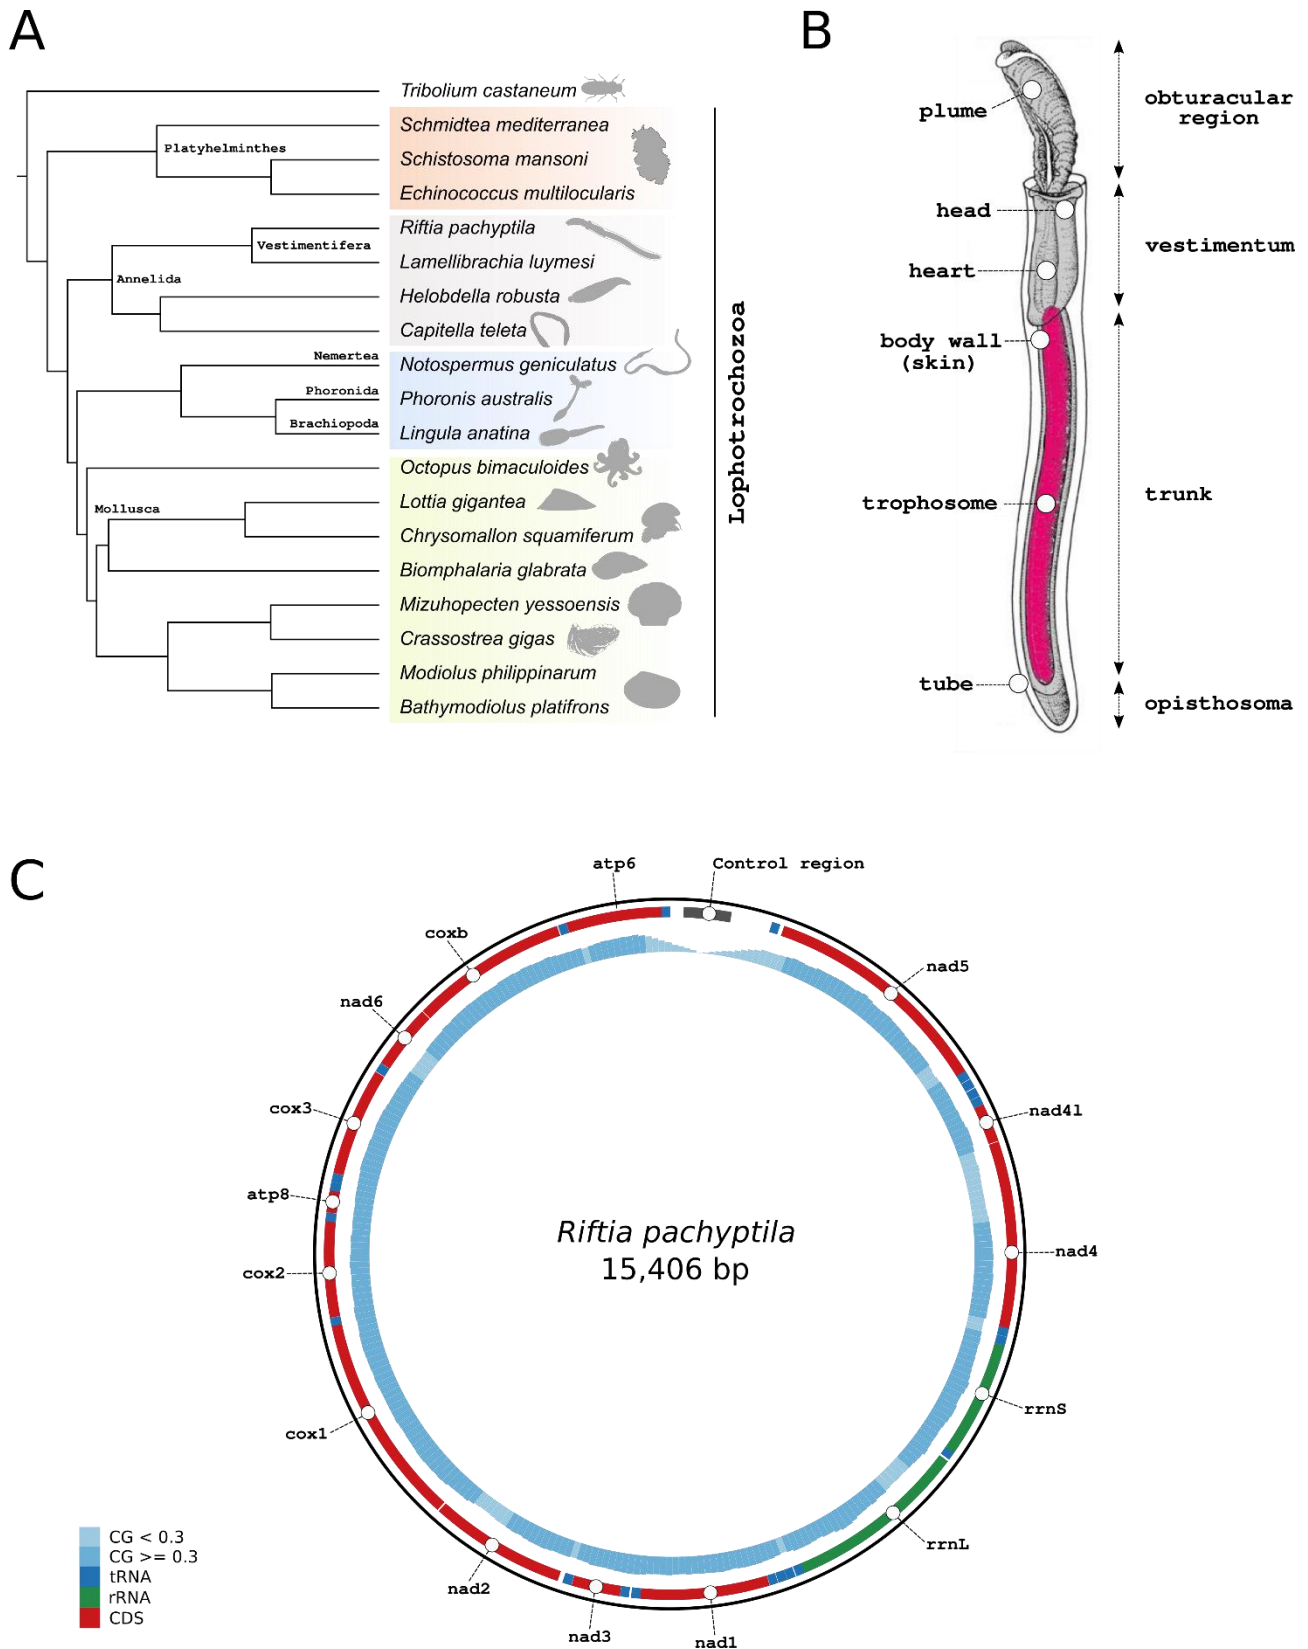

1276 drawing of *Riftia pachyptila* adult. The first part of the body, the obturacular region, contains the  
 1277 highly vascularised plume, whereas the head, heart and gonads are located in the second body  
 1278 part, the vestimentum. The trunk region and third body part harbors the trophosome (organ that  
 1279 houses the symbiotic bacteria), body wall (skin). The posterior part, the opisthosoma is the fourth  
 1280 and last body region of the tubeworm. Schematic drawing was modified from Nussbaumer et al.  
 1281 (2006). **C**, Schematic representation of *Riftia pachyptila* mitochondrial genome, including the  
 1282 complete control region. CG-content and tRNA genes are represented by the blue histograms and  
 1283 boxes, respectively.

1284

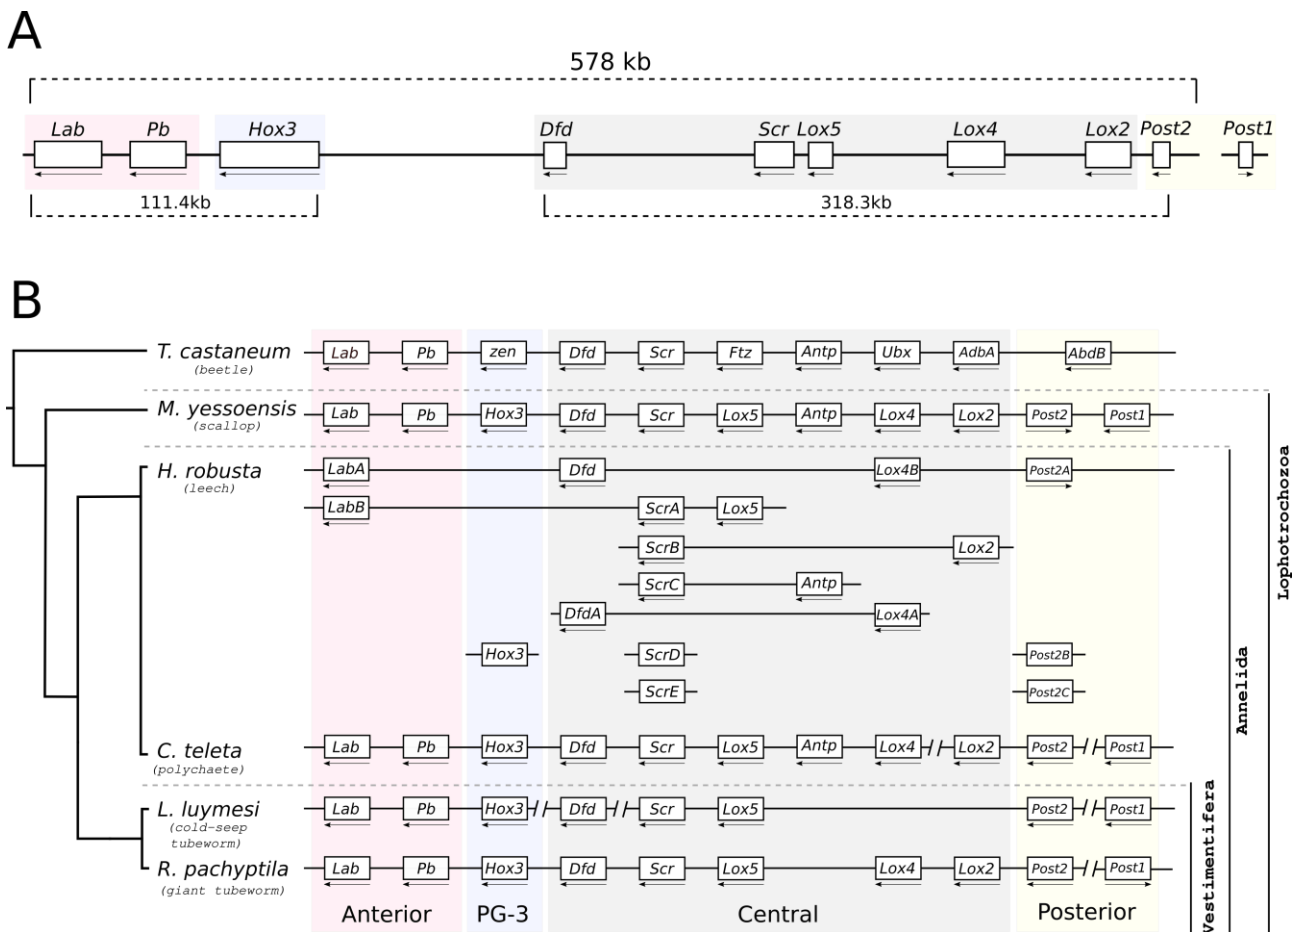

1285 Figure 2 – The Hox gene complement of *Riftia pachyptila* and selected metazoans. **A**, Hox cluster  
 1286 organisation in the genome of *Riftia pachyptila*. Nine out of the ten Hox genes are located in one  
 1287 single genomic scaffold. *Hox7* is missing from the giant tubeworm genome. Arrows indicate  
 1288 direction of transcription. Only the longest gene model is shown. **B**, Hox cluster present in selected  
 1289 metazoans. *Riftia* presents the most intact Hox cluster among annelids. Part of the central Hox  
 1290 class is missing from the cold-seep tubeworm *Lamellibrachia*. *Helobdella* and *Capitella* cluster are  
 1291 adapt from Simakov et al. (2013), whereas *Mizuhopecten* cluster is from Wang et al. (2017).



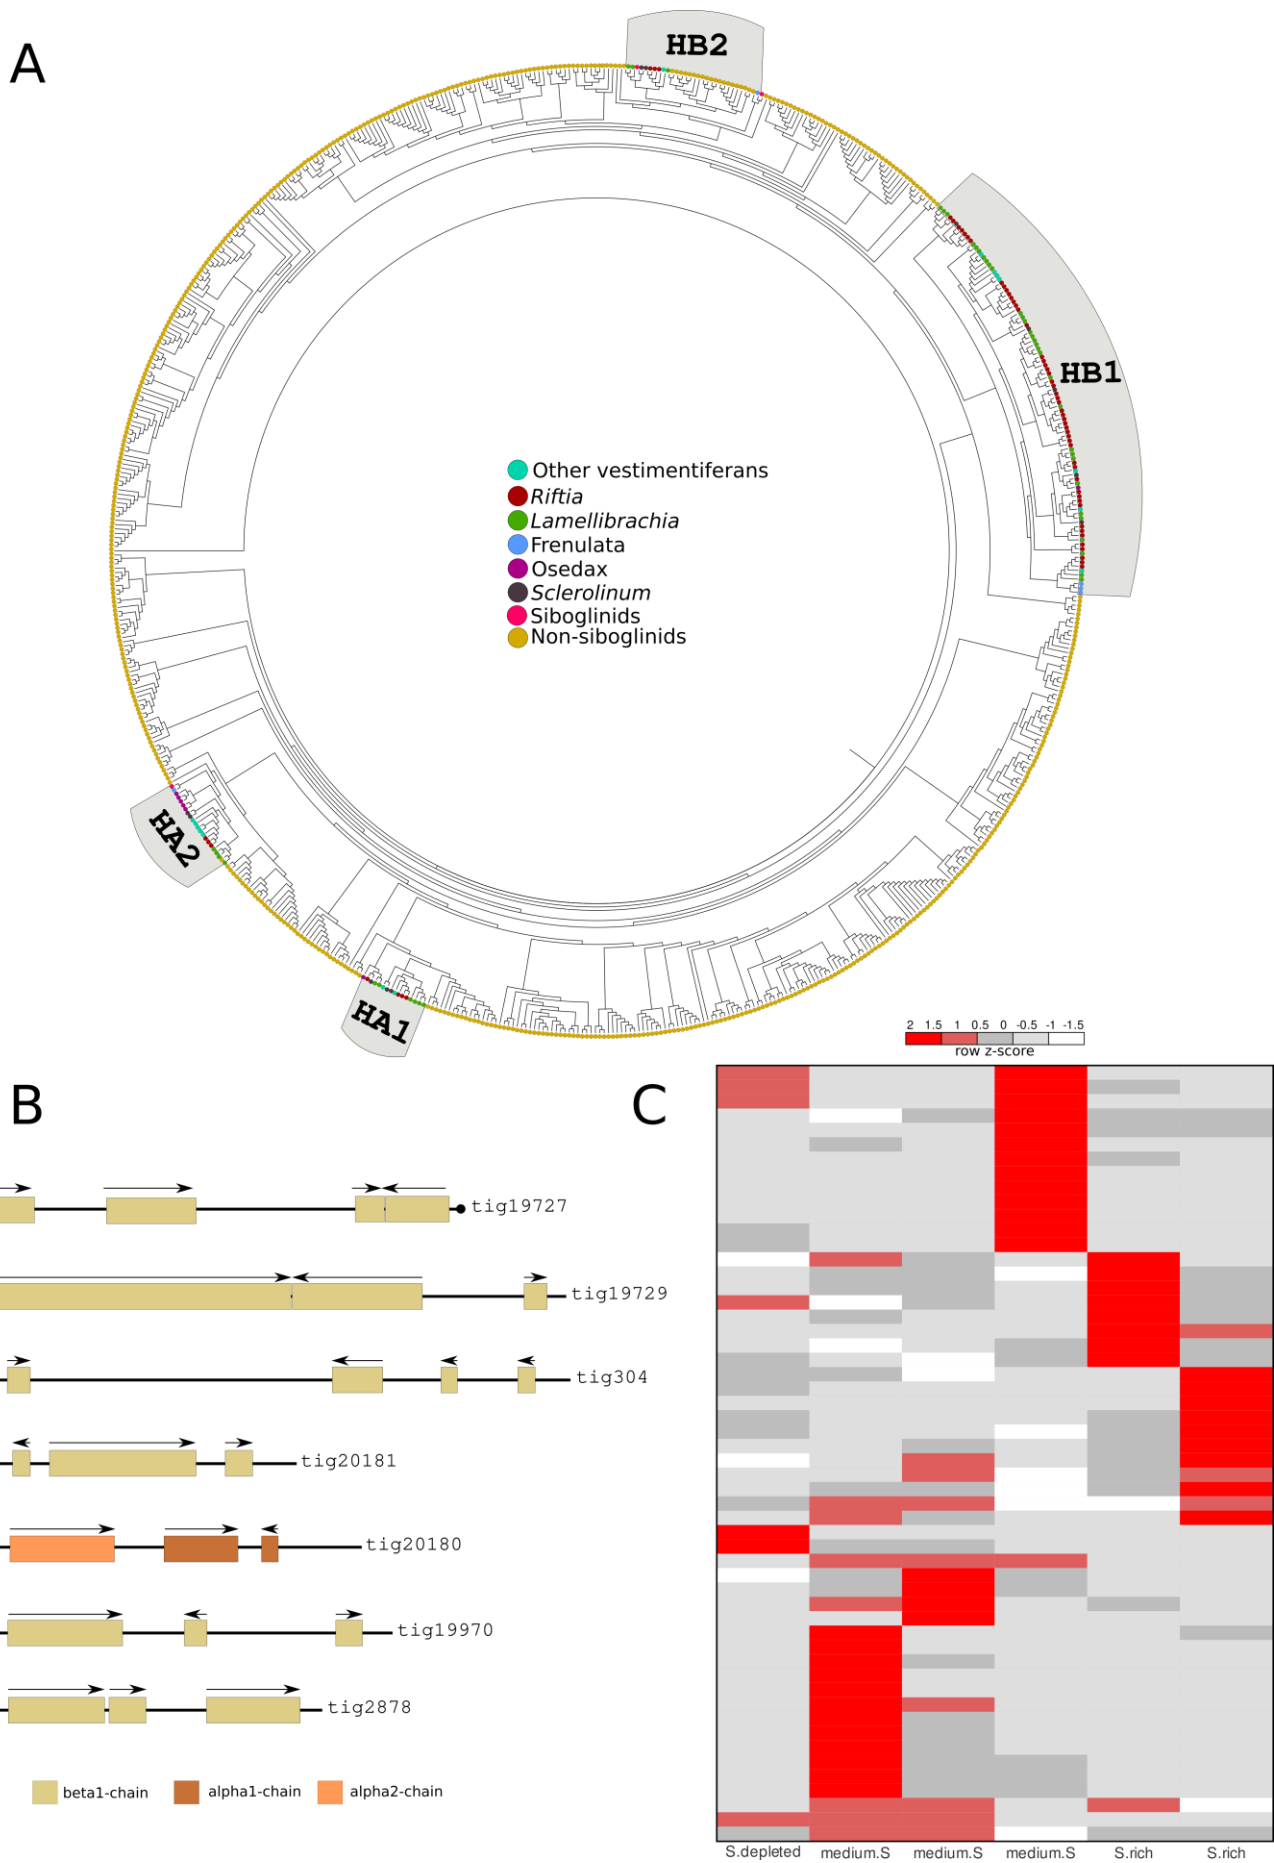

1292 Figure 3 – Expanded haemoglobin complement in *Riftia pachyptila*. **A**, Midpoint rooted phylogeny  
 1293 of 693 *Riftia*, annelid and metazoan haemoglobin genes, using Paiva et al. (2019) as backbone.

1294 Coloured circles correspond to different annelid taxa and metazoans. **B**, Seven genomic clusters of  
1295 haemoglobin genes in *Riftia* genome. Arrows indicate the direction of transcription. Scaffolds with a  
1296 circle on the end indicate the presence of Hb genes in the terminal end of the scaffolds. Only the  
1297 longest gene models are shown. Colours represent the different haemoglobin chains. Two  $\beta$ 1- and  
1298 one  $\beta$ 2-Hbs genes are located in three separate scaffolds (tig3224, 19723 and 19768). **C**, Heat  
1299 map expression of haemoglobins in the trophosome under three experimental conditions: medium  
1300 sulphide (medium.S), sulphide rich (S.rich) and sulphide depleted (S.depleted).

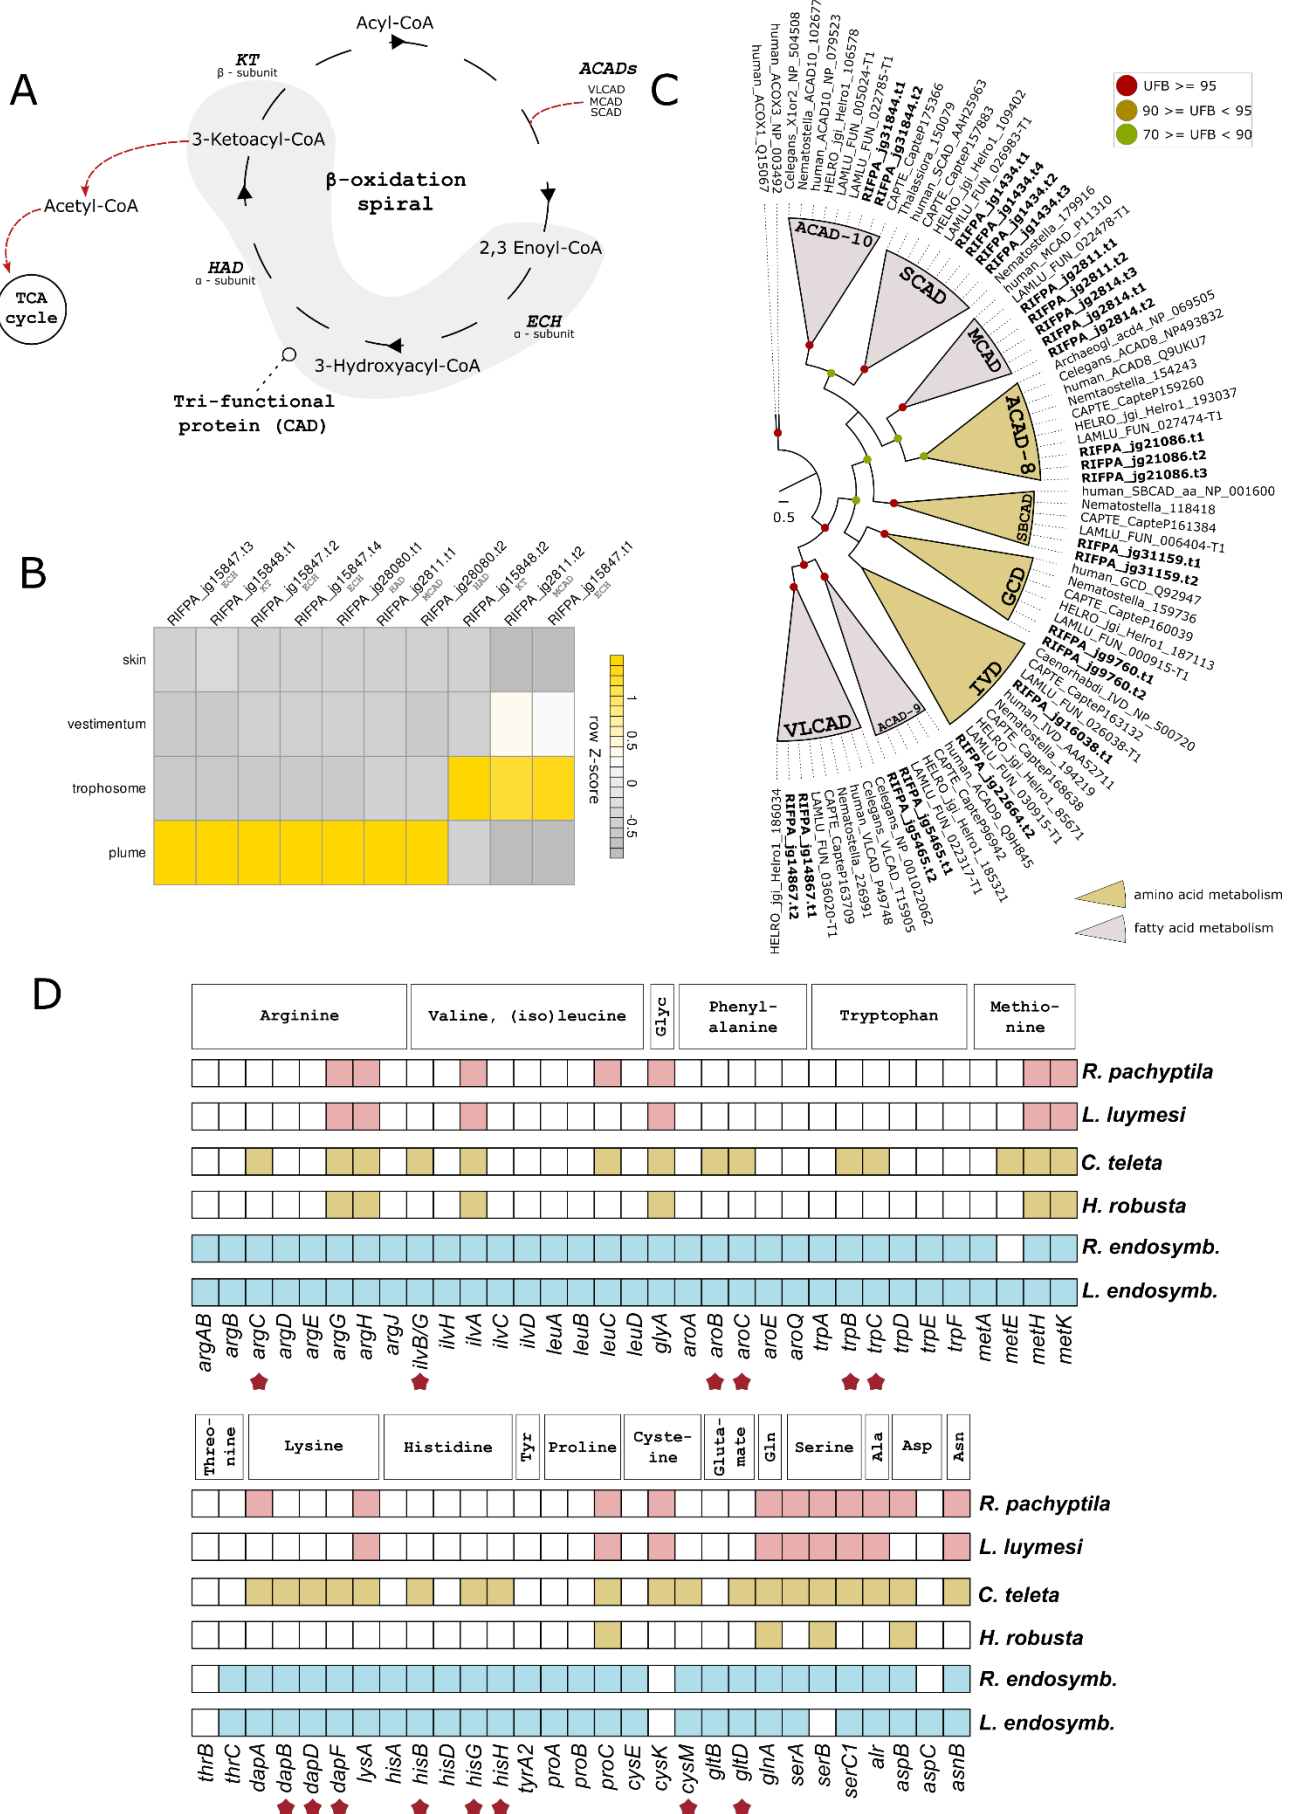

1301

1302 Figure 4 – Amino acid and fatty acid biosynthesis in *Riffia*. A, A schematic representation of  
 1303 mitochondrial fatty acid  $\beta$ -oxidation (FAO). The fatty acid degradation is performed in four

1304 enzymatic steps involving the membrane bound mitochondrial trifunctional protein and acyl-CoA  
 1305 dehydrogenases. The resulting acetyl-CoA is further oxidised in the TCA cycle. **B**, Expression  
 1306 profile of FAO genes. Colour coding reflects the expression patterns based on row Z-score  
 1307 calculations. The FAO pathway is activated in the trophosome and plume tissues. **C**, Maximum-  
 1308 likelihood phylogenetic tree inference of the ACAD genes using 1000 rapid bootstrap replicates.  
 1309 The branch support values are represented by the coloured circles in the tree nodes. Accession  
 1310 numbers for NCBI database are displayed after the species names and homologs were retrieved  
 1311 from a previous study (Swigoňová et al. 2009). *Capitella*, *Helobdella* and *Lamellibrachia* gene  
 1312 identification are derived from the publicly available annotated genomes. **D**, Key enzymes related  
 1313 to amino acid biosynthesis identified in *Riftia*, selected annelids and two tubeworm endosymbiont  
 1314 genomes. Identification of the genes was performed with KEGG and reconfirmed with similarity  
 1315 searches against publicly protein databases. *Riftia* and *Lamellibrachia* lack many amino acid  
 1316 biosynthesis genes indicating nutritional dependence on their endosymbionts. Stars represent  
 1317 genes present in the free-living polychaete *Capitella* and *Endoriftia* but absent in *Riftia* (based on Li  
 1318 et al. (2019) scheme).  
 1319

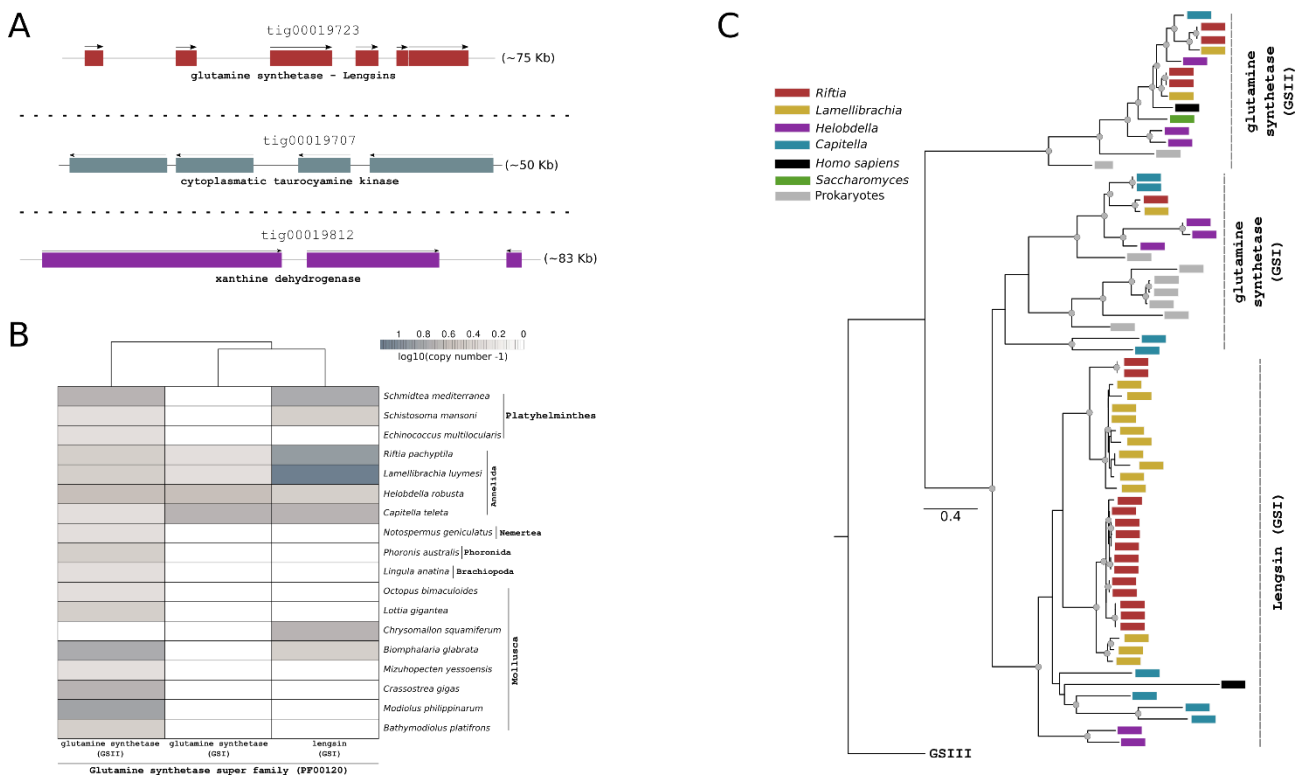

1320

1321 Figure 5 – Genomic clusters of important genes related to the nitrogen metabolism in *Riftia*, and  
 1322 distribution of phylogeny of glutamine synthetase genes among selected metazoans. **A**, Genomic  
 1323 organisation of important genes related to nitrogen metabolism in *Riftia*. Arrows indicate the  
 1324 direction of transcription. **B**, Distribution of glutamine synthetase-related genes in the giant  
 1325 tubeworm, closely related annelids, and selected lophotrochozoans. **C**, Maximum likelihood

1326 phylogenetic tree inference of members of the glutamine synthetase superfamily using 1000  
1327 ultrafast bootstrap replicates. Coloured boxes correspond to different annelids, vertebrates, yeast,  
1328 and prokaryotes.

1329

1330

## 1331 **Additional Information**

### 1332 **Supplementary tables**

1333 Supplementary Table 1 – *Riftia* genome and transcriptome pre-processing and annotation (.xlsx  
1334 document). **A-B**, Overview of the *Riftia* PacBio libraries and genome statistics for the different pre-  
1335 processed genome drafts. **C**, RepeatMasker results indicating the distribution of repeat elements in  
1336 the *Riftia* genome. **D**, Overview of the eight tissue-specific *Riftia* libraries, trimming statistics and *de*  
1337 *novo* assemblies. **E**, Mapping statistics of the individual tissue-specific transcriptomes using  
1338 StringTie (full length transcripts x draft genome) and Bowtie2 (transcriptome library X *de novo*  
1339 transcriptome) .**F**, Proteome prediction and BUSCO4 scores of the combined *de novo* and  
1340 reference-based transcriptomes. The predicted proteomes were also mapped against the nr  
1341 database.

1342

1343 Supplementary Table 2 – Databases used in the orthoFinder analysis (.xlsx document). **A**,  
1344 Metazoan databases used in the orthoFinder analysis. **B**, Phyletic distribution of the orthogroups  
1345 found in selected annelid genomes.

1346

1347

1348 Supplementary Table 3 – Overview and quantification of transcription factor families in selected  
1349 metazoans. Protein domain identification was performed with pfamscan. General overview of the  
1350 transcription factors identified in annelids, molluscs, flatworms, phoronids, brachiopods and  
1351 nemerteans.

1352

1353

1354 Supplementary Table 4 – Gene family analysis with CAFE. **A**, Average expansions rates calculated  
1355 by CAFE using lophotrochozoan orthogroups (N=18). Annelid values are highlighted in light red. **B-**  
1356 **D**, Expanded, contracted and rapidly evolving gene families identified by CAFE in the giant  
1357 tubeworm genome. Genes were annotated with Panther scoring tool. GO enrichment analyses  
1358 using lineage-specific genes were performed with topGO in the three distinct groups. The enriched  
1359 GO terms found in the three main ontologies are shown (Biological process, molecular function,  
1360 and cellular component). In **D**, light purple and light red rows indicated expanded and contracted  
1361 rapidly evolving orthogroups, respectively.

1362

1363

1364 Supplementary Table 5 – Lineage-specific gene annotation and GO enrichment analyses. **A-C**,  
1365 *Riftia*-, *Lamellibrachia*- and Siboglinidae-specific genes obtained through orthology analyses.  
1366 Genes were annotated with Panther scoring tool. GO enrichment analyses using lineage-specific  
1367 genes were performed with topGO in the three distinct groups. The enriched GO terms found in the  
1368 three main ontologies are shown (Biological process, molecular function, and cellular component).

1369

1370

1371 Supplementary Table 6 – Contracted and expanded PFAM analysis in selected lophotrochozoans  
1372 using two-tailed Fisher's exact test with Bonferroni correction. **A-D**, PFAM domain quantification  
1373 using four different sets of organisms. **A**- All lophotrochozoans and PFAM domains. **B** – All  
1374 lophotrochozoans without transposase- and DUF-associated domains. **C** – All lophotrochozoans  
1375 without transposase- and DUF-associated domains, except the siboglinids *Riftia* and  
1376 *Lamellibrachia*. **D**- All lophotrochozoans without transposase- and DUF-associated domains,  
1377 except deep-vent symbiotic animals. **E1-2**, Two-tailed Fisher's exact test with Bonferroni correction  
1378 using PFAM domains of *Riftia/Lamellibrachia*, and *Riftia*/average non-siboglinid lophotrochozoans  
1379 pairs. **F**, Two-tailed Fisher's exact test with Bonferroni correction using PFAM domains of  
1380 *Lamellibrachia* and average non siboglinid lophotrochozoans. **G1-4**, Pairwise two-tailed Fisher's  
1381 exact test with Bonferroni correction between deep-sea symbiotic animals (*Riftia*, *Lamellibrachia*,  
1382 *Bathymodiolus*, *Chrysomallon*) and the average non-deep-sea-symbiotic lophotrochozoans. **H**,  
1383 Overlapping contracted/expanded domains found in symbiotic deep-sea symbiotic  
1384 lophotrochozoans.

1385

1386

1387 Supplementary Table 7 – Positively selected genes identified by HyPhy and KaKs calculator. **A-B**,  
1388 Positively selected genes using two distinct methods. Gray rows correspond to positively selected  
1389 genes identified in both methods. Annotation of positively selected genes was performed with  
1390 Panther scoring tool.

1391

1392

1393 Supplementary Table 8 – Gene expression quantification of selected proteins and protein families.  
1394 **A-Y**, TPM (transcripts per million) values of selected proteins and protein families found in the eight  
1395 different tissue-specific transcriptomes of *Riftia*. Colour scale (red – minimum; yellow – percentile  
1396 50; green -max) depicts the TPM values of genes found in the different *Riftia* tissues.

1397

1398

1399 Supplementary Table 9 – Tau specific genes and GO enrichment analyses for the female tissue-  
1400 specific transcriptomes (.xlsx document). Annotation of tau genes was performed with Panther

1401 scoring tool. GO enrichment analyses using tau specific genes were performed with topGO in the  
1402 three distinct groups. The enriched GO terms found in the three main ontologies are shown  
1403 (Biological process, molecular function, and cellular component).

1404

1405

1406 Supplementary Table 10 – Distribution of important enzymes related to the biosynthesis of amino  
1407 acids in *Riftia*, *Lamellibrachia* and their endosymbionts. For comparison other two annelids were  
1408 included in the analysis (*Capitella*, *Hellobdella*). **A**, Distribution of key enzymes related to amino  
1409 acids biosynthesis based on the KEGG pathways. Colour scale (red – minimum; yellow –  
1410 percentile 50; green -max) depicts the number of genes found in the different annelid genomes. **B**,  
1411 Gene identifier of key enzymes related to the biosynthesis of amino acids in the *Capitella*,  
1412 *Hellobdella*, *Riftia* and *Lamellibrachia* genomes. **C**, Distribution of Endoriftia genes found in the  
1413 secretion system type II pathway, as presented in KEGG.

1414

1415 Supplementary Table 11 – Mitochondrial carrier proteins identified in the *Riftia* genome and their  
1416 PANTHER and blastp annotations. Genes highlighted in grey are highly expressed in the  
1417 trophosome tissue.

1418

1419 Supplementary Table 12 – SRA accession numbers for the genomic and transcriptomic data  
1420 generated in this study.

1421

#### 1422 **Supplementary files**

1423 Supplementary File 1: Supplementary information (.pdf).

1424

1425 Supplementary File 2: Rscript files, CAFE codes, *Riftia*'s gene model created with Augustus and  
1426 the giant tubeworm repeat database generated with RepeatModeler and RepeatMasker(.zip).
